1 **TITLE**

2 Phosphoproteomics uncovers exercise intensity-specific signaling networks underlying high-intensity  
3 interval training in human skeletal muscle

4

5 **AUTHOR LIST**

6 Nolan J. Hoffman <sup>1,6</sup>, Jamie Whitfield <sup>1</sup>, Di Xiao <sup>2</sup>, Bridget E. Radford <sup>1</sup>, Veronika Suni <sup>1</sup>, Ronnie Blazev  
7 <sup>4,5</sup>, Pengyi Yang <sup>2,3</sup>, Benjamin L. Parker <sup>4,5</sup>, John A. Hawley <sup>1</sup>

8

9 **AUTHOR AFFILIATIONS AND FOOTNOTES**

10 <sup>1</sup> Exercise and Nutrition Research Program, Mary MacKillop Institute for Health Research,  
11 Australian Catholic University, Melbourne, Victoria, Australia

12 <sup>2</sup> Computational Systems Biology Unit, Children's Medical Research Institute, Faculty of Medicine and  
13 Health, The University of Sydney, Westmead, New South Wales, Australia

14 <sup>3</sup> School of Mathematics and Statistics and Charles Perkins Centre, The University of Sydney, Sydney,  
15 New South Wales, Australia

16 <sup>4</sup> Department of Anatomy and Physiology, The University of Melbourne, Parkville, Victoria, Australia

17 <sup>5</sup> Centre for Muscle Research, The University of Melbourne, Parkville, Victoria, Australia

18 <sup>6</sup> Corresponding Author and Lead Contact

19

20 **CORRESPONDING AUTHOR AND LEAD CONTACT INFORMATION**

21 Nolan J. Hoffman, Ph.D.

22 Exercise and Nutrition Research Program, Mary MacKillop Institute for Health Research

23 Australian Catholic University

24 Level 5, 215 Spring Street, Melbourne, Victoria 3000 Australia

25 Email: [nolan.hoffman@acu.edu.au](mailto:nolan.hoffman@acu.edu.au)

26 Phone: (+61) 3 9230 8277

27 **SUMMARY**

28 In response to exercise, protein kinases and signaling networks are rapidly engaged in skeletal muscle to  
29 maintain energy homeostasis. High-intensity interval training (HIIT) induces superior or similar health-  
30 promoting skeletal muscle and whole-body adaptations compared to prolonged, moderate-intensity  
31 continuous training (MICT). However, the exercise intensity-specific signaling pathways underlying HIIT  
32 versus MICT are unknown. Ten healthy male participants completed bouts of work- and duration-  
33 matched HIIT and MICT cycling in randomized crossover trials. Mass spectrometry-based  
34 phosphoproteomic analysis of human muscle biopsies mapped acute signaling responses to HIIT and  
35 MICT, identifying 14,931 phosphopeptides and 8,509 phosphosites. Bioinformatics uncovered >1,000  
36 phosphosites significantly regulated by HIIT and/or MICT, including 92 and 348 respective HIIT-specific  
37 phosphosites after 5 and 10 min and >3,000 total phosphosites significantly correlated with plasma  
38 lactate. This first human muscle HIIT signaling network map has revealed rapid exercise intensity-  
39 specific regulation of kinases, substrates and pathways that may contribute to HIIT's unique health-  
40 promoting effects.

41

42 **KEYWORDS:** HIIT, MICT, high-intensity interval training, moderate-intensity continuous training,  
43 exercise, skeletal muscle, kinase, signal transduction, phosphoproteome, mass spectrometry

44

45

46

47

48

49

50

51

52

## 53 INTRODUCTION

54 Exercise training confers numerous beneficial physiological adaptations in skeletal muscle, imparting a  
55 wide range of whole-body health benefits that can prevent, delay and/or treat a range of chronic metabolic  
56 conditions including obesity, type 2 diabetes and cardiovascular disease (Furrer et al., 2023a; Hawley et  
57 al., 2014). Protein kinases and downstream signal transduction networks mediate these adaptations and  
58 are activated/deactivated in contracting skeletal muscles in response to exercise in order to meet increased  
59 energy and oxygen demands and maintain cellular energy homeostasis (Egan and Zierath, 2013;  
60 Hargreaves and Spriet, 2020). Protein phosphorylation is a key post-translational modification that  
61 regulates nearly all cellular biological processes, including skeletal muscle adaptations to exercise. These  
62 exercise-induced adaptations in skeletal muscle are influenced by factors such as the mode, intensity,  
63 duration and frequency of exercise by engaging distinct molecular transducers (Hoffman, 2017).

64 High-intensity interval training (HIIT) has attracted widespread scientific and popular interest as  
65 a low volume, time-effective exercise intervention capable of inducing superior (Milanovic et al., 2015)  
66 or similar (Campbell et al., 2019) physiological adaptations (e.g., increased cardiorespiratory fitness) and  
67 reductions in cardiometabolic disease risk factors compared to higher volume, moderate-intensity  
68 continuous training (MICT). HIIT-based exercise protocols involve multiple (i.e., 4-10) work bouts of  
69 high-intensity exercise ( $\geq 80\% \dot{V}O_{2\max}$ ) interspersed with periods of rest or active recovery (Gibala et  
70 al., 2012; MacInnis and Gibala, 2017). A single bout of HIIT activates several key exercise-regulated  
71 kinases including the AMP-activated protein kinase (AMPK) and p38 mitogen-activated protein kinase  
72 (p38MAPK) in skeletal muscle, stimulating mitochondrial biogenesis and leading to increased  
73 mitochondrial content and enzyme activity in as little as 24 h post-exercise (Little et al., 2011; Perry et al.,  
74 2010). Relative to a workload-matched bout of MICT, a single bout of HIIT elicits similar skeletal muscle  
75 exercise-induced increases in AMPK signaling (Trewin et al., 2018), as well as p38MAPK and p53 tumor  
76 suppressor protein (p53) signaling responses that underpin mitochondrial biogenesis in human skeletal  
77 muscle (Bartlett et al., 2012). Other studies of HIIT using acute intermittent Wingate testing (i.e., four all-  
78 out 30 s exercise bouts interspersed with four min rest) report increased AMPK and p38 MAPK signaling

79 activation immediately post-exercise (Gibala et al., 2009), but failed to detect any differences in signaling  
80 to key exercise-regulated kinases and gene expression responses involved in mitochondrial biogenesis  
81 compared to work-matched continuous exercise (Cochran et al., 2014). In contrast, increased activation of  
82 key signaling pathways including AMPK, p38 MAPK and Ca<sup>2+</sup>/calmodulin-dependent protein kinase II  
83 (CAMKII) has been detected in response to work-matched interval versus continuous exercise (Combes  
84 et al., 2015). However, in-depth analyses of the signaling networks engaged by HIIT versus MICT are  
85 lacking, with studies to date having analyzed only a subset of key exercise-regulated kinases, without  
86 investigating the breadth of potential signaling pathways underlying each exercise intervention.

87 Global mass spectrometry (MS)-based phosphoproteomics has the capability of identifying and  
88 quantifying thousands of protein phosphorylation events occurring within the complex and interconnected  
89 signaling networks engaged in response to exercise (Reisman et al., 2024). The first global  
90 phosphoproteomic analysis of exercise signaling in human skeletal muscle uncovered > 1,000 sites  
91 differentially phosphorylated after a short bout of continuous intense exercise (i.e., 8-12 min) versus rest  
92 (Hoffman et al., 2015). More recently, Blazev *et al.* utilized phosphoproteomics to map human skeletal  
93 muscle canonical signaling network responses to an acute bout of endurance (90 min cycling at 60%  $\dot{V}O_2$   
94 max), sprint (cycling all out for 3 x 30 s) and resistance exercise (6 sets of 10 repetition maximum knee  
95 extensions) in eight healthy male participants, revealing 420 core phosphosites common to all exercise  
96 modalities (Blazev et al., 2022). This study also identified divergent signaling responses to these different  
97 modalities of exercise, although the exercise bouts were not matched for total workload nor duration. As  
98 such, it is difficult to isolate the divergent signaling responses related to exercise intensity, as kinase  
99 regulation can display different time profiles of activation/deactivation (Blazev et al., 2022). Furthermore,  
100 the common and unique kinases and downstream signaling pathways engaged by HIIT versus MICT in  
101 human skeletal muscle remain unexplored and no global phosphoproteomic analyses of HIIT-based  
102 exercise have been performed to date.

103 Therefore, the overall aim of this study was to determine the temporal regulation of kinases and  
104 downstream signaling pathways by an acute bout of HIIT versus MICT within the same human

105 participants while controlling for total exercise duration, workload and diet. We hypothesized that HIIT  
106 would engage a unique subset of kinases and signaling pathways due to the intense, intermittent nature of  
107 this exercise modality, including increased activation of signaling networks underlying mitochondrial  
108 biogenesis. Utilizing a phosphoproteomic approach, this is the first study to map the human skeletal  
109 muscle signaling networks underlying an acute bout of HIIT and across different work-matched exercise  
110 intensities. We identify > 1,000 sites significantly regulated during (5 min) and immediately following  
111 (10 min) HIIT and/or MICT, including known and novel exercise-regulated signaling events.  
112 Furthermore, we identify a subset of kinases, substrates and pathways differentially regulated by HIIT  
113 relative to MICT and highly associated with plasma lactate responses to exercise, revealing the molecular  
114 framework underlying adaptive responses to HIIT that become rapidly engaged and contribute to HIIT's  
115 potent ability to stimulate unique muscle physiological adaptations and whole-body health benefits.

116

## 117 **RESULTS**

118 Ten healthy male participants were recruited and successfully completed all preliminary testing and the  
119 HIIT and MICT exercise bouts. The randomized crossover trial design permitted signaling responses to  
120 workload- and duration-matched HIIT and MICT exercise to be mapped and interrogated within the same  
121 participant (**Figure 1A**). Baseline whole-body anthropometric measurements and blood analyses  
122 confirmed these participants (age  $25.4 \pm 3.2$  y; BMI  $23.5 \pm 1.6$  kg/m<sup>2</sup>) were metabolically healthy, and  
123 maximal exercise capacity testing confirmed they were recreationally active but relatively untrained  
124 (relative peak oxygen uptake [ $\dot{V}O_{2\text{peak}}$ ]  $37.9 \pm 5.2$  mL/kg/min) in line with our recruitment strategy to  
125 maximize detection of skeletal muscle signaling responses to exercise (**Figure 1B**). Peak power output  
126 (PPO;  $208 \pm 40$  W) was used to prescribe the relative work-matched intensities for HIIT and MICT  
127 exercise. Lean mass from the DXA scan and resting metabolic rate (**Figure 1B**) were used to prescribe a  
128 standardized meal for each participant to consume prior to each exercise trial day.

129 Following consumption of a standardized dinner the evening before each trial, blood and skeletal  
130 muscle biopsy samples were collected in the fasted state at baseline and at 5 min and 10 min of each

131 respective exercise bout (**Figure 1A**). Participants completing the acute bout of HIIT cycling, which  
132 consisted of 5 x 1-min work bouts at  $85 \pm 0.1\%$  of individual PPO ( $176 \pm 34$  W) with 5 x 1-min active  
133 recovery intervals at 50 W, displayed increased plasma lactate concentrations at 5 and 10 min of exercise  
134 relative to pre-exercise baseline (**Figure 1C**;  $P < 0.0001$  and  $P < 0.001$ , respectively; main effect of time  
135  $P < 0.0001$ ) with no changes in plasma glucose levels (**Figure 1D**). In response to a total work- and  
136 duration-matched acute bout of MICT ( $55 \pm 2\%$  individual PPO;  $113 \pm 17$  W), participants displayed  
137 increased plasma lactate concentrations at 5 and 10 min of exercise compared to baseline (**Figure 1C**;  $P <$   
138  $0.001$ ; main effect of time  $P < 0.0001$ ) with no changes in plasma glucose concentrations (**Figure 1D**).  
139 There was a main effect of higher plasma lactate levels in response to HIIT (**Figure 1C**;  $P < 0.05$ ).

140 To map the signaling networks regulated by HIIT and MICT, proteins from each skeletal muscle  
141 biopsy sample were extracted, reduced/alkylated, digested to peptides, and isobarically labeled prior to  
142 phosphopeptide enrichment, fractionation and liquid chromatography with tandem MS (LC-MS/MS)  
143 phosphoproteomic analysis (**Figure 2A**). Principal component analysis (PCA; **Figure 2B**) and  
144 hierarchical clustering (**Figure 2C**) using the PhosR phosphoproteomic data analysis pipeline (Kim et al.,  
145 2021a) revealed a high level of consistency in the overall baseline signaling signature at rest (0 min) prior  
146 to the HIIT and MICT exercise trials, confirming our pre-exercise standardization strategies were  
147 effective. Distinct clusters were observed in response to the two divergent exercise challenges, with the 5  
148 and 10 min HIIT signaling profiles clustering farthest away from the pre-exercise control profile (**Figure**  
149 **2B-2C**). Overall, 19% of the total variance in the phosphoproteomic dataset was explained by principal  
150 component (PC)1, while PC2 explained 6% of the variance (**Figure 2B**). Global phosphoproteomics  
151 identified and quantified a total of 14,931 phosphopeptides (**Figure 2D, Supplemental Table 1**),  
152 corresponding to 8,509 phosphorylation sites (**Figure 2D, Supplemental Table 2**).

153 Bioinformatic analyses of these phosphoproteomic data using PhosR (Kim et al., 2021a)  
154 identified >1,000 phosphosites significantly regulated ( $-/+ 1.5$ -fold change; adjusted  $P < 0.05$ ; identified  
155 in  $\geq 3$  participants and  $\geq 1$  timepoint) by HIIT and/or MICT after 5 and 10 min, with < 400 of these sites  
156 differentially regulated post- versus mid-exercise (**Figure 2E; Supplemental Table 3**). Significantly

157 regulated phosphosites observed in response to HIIT and/or MICT included kinases and substrates shown  
158 to be regulated by an acute bout of continuous high-intensity cycling such as those within the AMPK  
159 pathway (Hoffman et al. 2015; e.g., ACACB S222 (HIIT and MICT), AKAP1 S107 (MICT only),  
160 RPTOR S722 (HIIT and MICT), STBD1 S175 (HIIT and MICT; (Ducommun et al., 2019)), TBC1D1  
161 S237 (HIIT and MICT) and TBC1D4 S704 (5-min HIIT only)). Multiple substrates of protein kinase A  
162 (PKA; PHKA1 S1018 and HSBP6 S16) were increased by both HIIT and MICT, while the PKA substrate  
163 CDK16 S110 was only increased after 10 min of HIIT. In addition, the known Akt substrate IRS1 S629  
164 was only regulated after 10 min of both HIIT and MICT (Hoffman et al., 2015).

165 In response to HIIT, a total of 1,697 phosphosites (**Figure 3A**; including 1,235 and 462 down-  
166 and up-regulated, respectively) and 2,127 phosphosites (**Figure 3B**; including 1,580 and 547 down- and  
167 up-regulated, respectively) were significantly regulated after 5 and 10 min of exercise, respectively  
168 (**Figure 2E, Supplemental Table 3**). The top 10 sites displaying the most robust increases in  
169 phosphorylation in response to HIIT at 5 min versus rest included MYLPF T10, ZAC S454, FGA S285,  
170 MTFP1 S129, EEF2 T59, MAPRE2 S229, LMNA T424, HRC T207, ADSSL1 S7 and MTFP1 S128. The  
171 10 phosphosites decreasing the most in response to HIIT at 5 min compared to rest included RTN4 S738,  
172 PDHA1 S262, DCLK1 S358, PDHA1 S201 and S269, SYNM T1109, MAP1B S1793, NGFR S217,  
173 SLC4A1 S349 and TRIP10 S354 (**Figure 3A; Supplemental Table 3**). After 10 min, top phosphosites  
174 most robustly increased by HIIT versus rest included CBX1 S89, MAPRE2 S229, MTFP1 S129, HRC  
175 T207, EEF2 T59, STBD1 S175, EEF2 T57, HRC S299, ZAK S454 and CIC S1371. Sites displaying the  
176 most decreased levels of phosphorylation by HIIT at 10 min included RTN4 S738, PDHA1 S201,  
177 SLC4A1 S349, KRI1 S142, NGFR S217, DCLK1 S358, CMYA5 S2825, TXNIP T294, CLASP2 S326  
178 and SRRMS S2398 (**Figure 3B; Supplemental Table 3**). A total of 352 sites were differentially  
179 regulated after 10 versus 5 min HIIT (**Figure 2E**), including 212 down- and 140 up-regulated  
180 phosphosites (**Figure 3C; Supplemental Table 3**).

181 MICT induced changes in a lower number of significantly regulated phosphosites including a  
182 total of 1,158 phosphosites after 5 min (**Figure 2E and 3D**; 758 and 400 down- and up-regulated,

183 respectively) and 1,125 phosphosites after 10 min (**Figure 2E and 3E**; 788 and 337 down- and up-  
184 regulated, respectively). A total of 110 sites were differentially regulated after 10 versus 5 min MICT,  
185 including 79 down- and 31 up-regulated phosphosites (**Figure 2E and 3F**; **Supplemental Table 3**).

186 To identify unique sites regulated by a single bout of HIIT relative to MICT, the signaling  
187 responses to each exercise intensity were next compared. After 5 min of HIIT, 71 phosphosites were  
188 down-regulated, while 21 phosphosites were up-regulated, relative to MICT (**Figure 2E and 3G**;  
189 **Supplemental Table 3**). These exercise intensity-specific signaling responses to HIIT were observed to  
190 be more robust at 10 min, with 275 phosphosites down-regulated and 73 phosphosites up-regulated  
191 compared to MICT (**Figure 2E and 3H**; **Supplemental Table 3**). Top exercise intensity-specific  
192 phosphosites most robustly up-regulated by HIIT relative to MICT included MTFP1 S128/S129  
193 (increased by 5 and 10 min HIIT; S129 also increased by 5 and 10 min MICT), MYL5 S20/S21/S25  
194 (increased by 10 min HIIT; decreased by 5 min MICT) and TDRD9 Y546/S552 (increased by 10 min  
195 HIIT; decreased by 5 min MICT). Exercise intensity-specific phosphosites down-regulated the most by  
196 HIIT versus MICT included GP1BB T193 (decreased by 5 and 10 min HIIT; increased by 5 min MICT),  
197 ATAD2B S374 (decreased by 5 and 10 min HIIT; decreased by 10 min MICT), MAPK1 T181 (decreased  
198 by 5 min HIIT; not regulated by MICT), ADD2 S532 and GP1BA S606 (decreased by 5 and 10 min  
199 HIIT; increased by 5 min MICT) and RYR1 T1399 (decreased by 5 and 10 min HIIT; decreased by 10  
200 min MICT) (**Figure 3G-H**; **Supplemental Table 3**).

201 Kinase enrichment analyses were next performed to identify common and divergent  
202 activation/deactivation of kinases in response to the two exercise bouts (**Figure 4A**). Kinase activities  
203 were inferred via direction analysis using kinase perturbation analysis (kinasePA; (Yang et al., 2016)), to  
204 annotate and visualize how kinases with at least five quantified known substrates were perturbed by each  
205 exercise intensity and timepoint. These analyses confirmed activation/deactivation of known exercise-  
206 regulated kinases in response to both HIIT and MICT relative to pre-exercise, with significant kinase  
207 activity enrichments considered as kinases displaying  $|z\text{-score}| > 1.6$ . Kinases displaying similar  
208 increases in the levels of inferred kinase activity in response to both HIIT and MICT after 5 and/or 10 min



209 included eukaryotic elongation factor 2 kinase (EEF2K), AKT1, AMPK alpha 1 catalytic subunit  
210 (PRKAA1), protein kinase cGMP-dependent 1 (PRKG1), and PKA subunit alpha (PRKACA),  
211 serum/glucocorticoid regulated kinase 1 (SGK1), ribosomal protein S6 kinase alpha-1 subunit  
212 (RPS6KA1), and MAP kinase-activated protein kinase 2 (MAPKAPK2). Moreover, exercise-induced  
213 decreases in the kinase activity of mammalian target of rapamycin (MTOR) were observed in response to  
214 both HIIT and MICT after 5 and 10 min. A strong trend for decreased kinase activity (i.e., z-score  $\sim -1.6$ )  
215 of DNA-dependent protein kinase catalytic subunit (PRKDC) was also observed after 5 and/or 10 min of  
216 both HIIT and MICT.

217 Kinase enrichment analyses also revealed unique kinases that were differentially  
218 activated/deactivated (i.e.,  $|z\text{-score}| > 1.6$ ) in response to HIIT versus MICT after 5 and/or 10 min  
219 (**Figure 4A**). For example, activation of unique protein kinase C (PKC) conventional/atypical isoforms  
220 were observed to be differentially regulated by HIIT versus MICT, with increased activity of the  
221 conventional PKC alpha isoform (PRKCA; z-score  $> 1.6$ ), as well as a strong trend for increased activity  
222 of the conventional PKC beta isoform (PRKCB; z-score  $\sim 1.6$ ), in response to only 10 min HIIT. In  
223 contrast, activity of the atypical PKC zeta isoform (PRKCZ) was increased only by 5 and 10 min MICT  
224 (z-score  $> 1.6$ ). Other kinases shown to be uniquely activated by HIIT or MICT and/or displaying strong  
225 trends for exercise intensity-specific activation included S6 kinase beta-2 subunit (RPS6KB2; increased  
226 only by 5 and 10 min HIIT; z-score  $\geq 1.6$ ), proto-oncogene tyrosine-protein kinase SRC (only increased  
227 by 10 min HIIT; z-score  $\sim 1.6$ ), large tumor suppressor kinase 2 (LATS2; only increased by 10 min  
228 MICT; z-score  $\sim 1.6$ ), CAMK2A (increased only by 5 and 10 min MICT; z-score  $\geq 1.6$ ), large tumor  
229 suppressor kinase 1 (LATS1; only increased by 5 min MICT; z-score  $\sim 1.6$ ), and mitogen-activated  
230 protein kinase 12 (MAPK12; only decreased by 10 min HIIT; z-score  $\sim -1.6$ ).

231 Additional kinases that displayed unique and/or attenuated kinase activation trajectories in  
232 response to HIIT versus MICT but failed to reach significance in kinase enrichment analyses (**Figure 4A**;  
233  $|z\text{-score}| < 1.6$ ) included serine/threonine kinase 38 (STK38) with attenuated levels of activation in  
234 response to MICT relative to HIIT. In addition, glycogen synthase kinase 3 beta (GSK3B), casein kinase

235 2 alpha 1 (CSNK2A1), and ribosomal protein S6 kinase beta-1 subunit (RPS6KB1) all displayed trends  
236 for increased activation by HIIT with little or no activation detected in response to MICT. In contrast,  
237 polo-like kinase 1 (PLK1) and novel PKC delta isoform (PRKCD) showed trends for decreased activation  
238 in response to HIIT with little or no activation by MICT. Mitogen-activated protein kinase 11 (MAPK11)  
239 displayed opposite trends of activation between exercise intensities, with a tendency for decreased  
240 activation after 10 min of HIIT but increased activation after 5 min of MICT.

241 Pathway enrichment analyses were next performed using the Reactome database to determine  
242 biological pathways that were enriched within the lists of significantly regulated genes (corresponding to  
243 their respective phosphoproteins) for each exercise intensity and timepoint relative to pre-exercise, with  
244 significant enrichment considered as pathways displaying  $|z\text{-score}| > 1.6$  (**Figure 4B**). Up-regulated  
245 Reactome pathways (i.e.,  $z\text{-score} > 1.6$ ) enriched in response to both HIIT and MICT after 5 and/or 10  
246 min included expected exercise-regulated biological pathways such as ‘chromosome maintenance’,  
247 ‘transcription’, ‘opioid signaling’, ‘pyruvate metabolism and citric acid TCA cycle’, ‘glucose  
248 metabolism’ and ‘gluconeogenesis’. Down-regulated Reactome pathways (i.e.,  $z\text{-score} < -1.6$ ) enriched in  
249 response to both HIIT and MICT after 5 and/or 10 min included ‘L1CAM interactions’, ‘PI3K Akt  
250 activation’ and ‘platelet activation signaling and aggregation’.

251 The only Reactome pathway observed to be positively enriched in response to HIIT after 5 and/or  
252 10 min but not enriched by MICT was ‘RNA polymerase I and III and mitochondrial transcription’  
253 (**Figure 4B**). The only two pathways observed to be negatively enriched in response to HIIT after 5  
254 and/or 10 min but not MICT included ‘P75 NTR receptor mediated signaling’ and ‘regulation of mRNA  
255 stability by proteins that bind AU rich elements’. In contrast, Reactome pathways positively enriched in  
256 response to MICT after 5 and/or 10 min but not enriched by HIIT included ‘integration of energy  
257 metabolism’, ‘TCA cycle and respiratory electron transport’, ‘phospholipid metabolism’, ‘metabolism of  
258 nucleotides’, and ‘fatty acid triacylglycerol and ketone body metabolism’. Pathways negatively enriched  
259 in response to MICT after 5 and/or 10 min that were not enriched by HIIT included ‘SLC mediated

260 transmembrane transport', 'GAB1 signalosome', '3' UTR mediated translational regulation', and 'gastrin  
261 CREB signaling pathway via PKC and MAPK'.

262 Kinase-substrate associations were next predicted in response to HIIT and MICT via the  
263 phosphoproteomic signaling profiles and kinase recognition motif of known substrates using kinasePA  
264 (**Figure 5**; (Yang et al., 2016)). This analysis generated predictions matrices, with columns corresponding  
265 to kinases, rows corresponding to phosphosites, and values denoting how likely a phosphosite is  
266 phosphorylated by a given kinase in response to HIIT (**Figure 5A**) and MICT (**Figure 5B**). Pathway  
267 enrichment analyses were then performed using phosphosites with a high prediction score for each kinase  
268 to observe how biological pathways containing substrate phosphosites are commonly and/or uniquely  
269 regulated by HIIT (**Figure 5C**) versus MICT (**Figure 5D**). Collectively, these analyses revealed that a  
270 range of kinases displayed unique patterns and/or significance levels of signaling pathway regulation in  
271 response to each exercise intensity including HIPK2, GSK3B, CDK6, CDK2, CDK1, CDK7, MAPK14,  
272 MAPK3, CHEK1, PRKCG, CDK5, PRKDC, PIM2, PRKCQ, PRKCD, CSNK2A1, PLK1, AKT1,  
273 PRKCB and PRKCA (**Figure 5C-D**).

274 Using these matrices, signalome networks were then reconstructed based on the correlation  
275 between kinases to visualize how kinases and substrates are regulated in response to HIIT (**Figure 6A**)  
276 versus MICT (**Figure 6B**). This revealed distinct signalome profiles between HIIT and MICT, with  
277 kinases clustered closer together more highly correlated in terms of their kinase-substrate predictions. To  
278 determine the proportion of common and unique substrates targeted by specific kinases in response to  
279 HIIT versus MICT, phosphoproteins were clustered into protein modules according to their prediction  
280 matrices shown in **Figure 5A-B**. This clustering revealed five unique clusters of HIIT and MICT kinase-  
281 substrate signaling profiles (**Supplemental Figure 1A-E**; modules 1 to 5). Visualization of these five  
282 clusters for individual kinases revealed shared or unique substrate signaling trajectories in response to  
283 HIIT (**Figure 6C**) versus MICT (**Figure 6D**) within their unique signalome networks. For example,  
284 widely studied exercise-regulated kinases including AKT1, CAMK2A, MAPK1, MAPK3, MTOR and  
285 PRKAA1 displayed similar substrate clusters between exercise intensities, while other kinases such as

286 ABL2, MAPK14, PLK1, PRKCA, PRKCE, RPS6KA1 and STK38 regulated unique substrate clusters in  
287 response to HIIT versus MICT (**Figure 6C-D**).

288 Finally, to demonstrate the utility of the global phosphoproteomic dataset and test the hypothesis  
289 that higher plasma lactate concentrations during HIIT can influence which skeletal muscle exercise-  
290 regulated signaling proteins become engaged, correlation analyses were performed to interrogate  
291 individual phosphorylation site responses within the dataset relative to the plasma lactate responses to  
292 HIIT and MICT exercise. A total of 3,084 phosphosites were significantly correlated with plasma lactate  
293 concentrations from each timepoint and exercise intensity (**Supplemental Table 4**;  $q < 0.05$  with  
294 Benjamini Hochberg false discovery rate (FDR)). Among these phosphosites, nine of the top 50 most  
295 significantly correlated phosphosites have annotated functional roles in regulating their respective  
296 protein's activation state in the PhosphoSitePlus annotation database (**Figure 7A-D**; (Hornbeck et al.,  
297 2012)). For example, four of these top nine phosphosites that were significantly correlated with plasma  
298 lactate have experimentally validated roles in governing their respective protein's activity and are  
299 involved in regulating a range of key metabolic processes (e.g., glycolysis, glucose transport and  
300 mitochondrial biogenesis) including PDHA1 S201 (**Figure 7A**), RPTOR S859 (**Figure 7B**), TFEB  
301 S123/S128/S136 (**Figure 7C**) and TBC1D4 S588 (**Figure 7D**). Other phosphosites among the top 10%  
302 most significantly correlated sites with plasma lactate concentrations included known AMPK-regulated  
303 sites (e.g., ACACB S222; mitochondrial fission regulator-1 like protein (MTFR1L) S141 (Tilokani et al.,  
304 2022)), as well as novel phosphosites with no known functional role (e.g., DENND4C S989,  
305 phosphoprotein present in glucose transporter GLUT4 vesicles; MTFP1 S128/S129, phosphoprotein  
306 involved in inner mitochondrial membrane fission/fusion) that may respectively be involved in regulating  
307 skeletal muscle glucose transport and mitochondrial network dynamics in response to exercise.

308

## 309 **DISCUSSION**

310 For the first time, this analysis of the HIIT signaling network in human skeletal muscle has revealed the  
311 early time course of acute signaling events underlying muscle adaptive responses to HIIT versus MICT.

312 Our global phosphoproteomic approach has revealed the rapid induction of a complex network of  
313 common and exercise intensity-specific kinases, substrates and pathways regulated by a single bout of  
314 HIIT versus work-matched MICT after just 5 min of exercise, that were highly correlated with the  
315 prevailing plasma lactate responses to each exercise intensity. To the best of our knowledge, this is the  
316 first phosphoproteomic study of exercise signaling that has matched for workload and duration to assess  
317 divergent signaling responses between exercise intensities.

318 The matching of total workload and duration between exercise bouts is important and contrasts  
319 previous phosphoproteomic studies that have compared exercise signaling responses to divergent  
320 workloads of differing durations and modalities (Blazev et al., 2022). Such an approach permitted  
321 resolution of time-sensitive profiles of distinct signaling responses comparing the effects of a moderate-  
322 intensity continuous exercise challenge to a high-intensity interval-based exercise protocol within the  
323 same participants in a crossover study design, allowing sufficient recovery (i.e., > 10 days) to ensure no  
324 residual effects of the previous exercise bout. Standardized meal provision before each trial prescribed in  
325 accordance with each participant's body composition, resting metabolic rate and food diary records led to  
326 a highly reproducible resting 'baseline' signaling signature for each participant, confirming a high level of  
327 control and reinforcing the importance of utilizing dietary standardization in addition to just overnight  
328 fasting to help control for potential differences in nutrient/energy availability between trials.

329 This study utilized a metabolically healthy, but untrained participant cohort to induce robust  
330 signaling responses, as available evidence indicates exercise-induced signaling responses in skeletal  
331 muscle such as AMPK activation are more pronounced in untrained relative to trained human participants  
332 (McConnell et al., 2005; Yu et al., 2003). All ten participants were able to successfully complete both  
333 work-matched exercise trials, with the HIIT protocol eliciting higher plasma lactate concentrations  
334 compared to MICT. The two exercise intensities both provided a robust contractile stimulus that engaged  
335 a range of known exercise-regulated kinases including activation of AMPK (regulated by AMP/ATP and  
336 ADP/ATP ratios), EE2K (regulated by  $Ca^{2+}$ /calmodulin), PKA (regulated by cAMP) and PRKG1  
337 (regulated by NO/cGMP). Activation of AKT1 increased after 10 min (e.g., inferred via known substrate

338 IRS1 S629), while surrogate markers of MTOR activation decreased (e.g., NDRG2 T248 decreased only  
339 after 10 min HIIT; NDRG2 S344 increased only after 5 and 10 min MICT), in response to both exercise  
340 intensities. Overall, a higher number of phosphosites were down-regulated versus up-regulated at each  
341 timepoint and exercise intensity, suggestive of acute exercise-regulated kinases becoming inhibited and/or  
342 phosphatases becoming activated early after commencing exercise.

343 In this study mitochondrial fission process 1 (MTFP1; also known as MTP18) S128/S129 were  
344 identified among the top HIIT-regulated sites, with S128 only regulated by HIIT and more robust  
345 phosphorylation of S129 observed following HIIT versus MICT. The inner mitochondrial membrane  
346 protein MTFP1 has known roles in mitochondrial fission/fusion and was previously identified as having  
347 increased abundance in rat diaphragm following endurance exercise training (Sollanek et al., 2017), but  
348 has not been implicated in acute exercise signaling to date. MTFP1 has recently emerged as a key  
349 regulator of liver mitochondrial and metabolic activity, with liver-specific deletion of MTFP1 in mice  
350 conferring protection against high fat diet-induced metabolic dysfunction and hepatosteatosis via  
351 upregulating oxidative phosphorylation activity and mitochondrial respiration (Patitucci et al., 2023).  
352 MTFP1 has been identified as a gene target of the master regulator of skeletal muscle mitochondrial  
353 biogenesis, the peroxisome proliferator-activated receptor gamma coactivator 1-alpha (PGC-1 $\alpha$ ), in  
354 C2C12 myotubes (Nsiah-Sefaa et al., 2014) with its translation regulated by mTORC1 activity (Morita et  
355 al., 2017). Human skeletal muscle MTFP1 gene expression, concomitant with PGC-1 $\alpha$  expression, was  
356 recently shown to be reduced by leg immobilization and increased upon resumption of physical activity  
357 and resistance exercise training (Pileggi et al., 2023). Collectively, this growing body of evidence  
358 suggests that unique phosphorylation of MTFP1 in response to HIIT may represent a novel mechanism  
359 underlying exercise-regulated mitochondrial inner membrane fission and/or fusion. Further investigation  
360 of MTFP1's potential functional roles in maintaining skeletal muscle mitochondrial networks and  
361 metabolic homeostasis is warranted.

362 The observed differences in work-matched HIIT versus MICT signaling responses may be due to  
363 stochastic changes or accumulation of intracellular calcium and/or other metabolites in response to

364 fluctuating energy demands during HIIT's repeated work-rest cycles (Gibala and Hawley, 2017), and is  
365 consistent with other studies investigating effects of acute work-matched bouts of HIIT versus MICT  
366 (Bartlett et al., 2012; Peake et al., 2014). Indeed, investigations that have determined metabolic  
367 fluctuations occurring in work-matched interval versus continuous exercise have observed a greater level  
368 of activation of kinases such as AMPK, CaMKII and p38 MAPK, suggesting that buildup of upstream  
369 stimuli for these kinases (e.g., increased AMP/ATP and/or ADP/ATP ratios, intracellular calcium) may  
370 trigger greater activation in response to interval-based exercise (Combes et al., 2015). While levels of  
371 AMPK activation were similar between HIIT and MICT in this study, differential activation of PKC  
372 conventional/atypical isoforms suggests potential influence of muscle intracellular calcium during HIIT.  
373 For example, activation of the atypical PKC isoform PRKCZ was only observed in response to 5 and 10  
374 min MICT, supporting previous observations of human muscle PRKCZ phosphorylation and/or activation  
375 in response to continuous cycling at ~70-75%  $\dot{V}O_{2peak}$  (Perrini et al., 2004; Rose et al., 2004), as rapidly  
376 as the first 5 min after commencing exercise (Rose et al., 2004). The present study has revealed  
377 previously unappreciated exercise intensity-specific activation of calcium-responsive conventional PKC  
378 isoforms (i.e., PRKCA, and a trend for increased activation of PRKCB) in response to HIIT, suggesting  
379 intracellular calcium spikes during HIIT intervals may drive PKC isoform-specific activation. As no  
380 further increase in atypical PKC isoform activity was observed in previous studies in response to  
381 increased continuous exercise intensity (Richter et al., 2004), these data suggest the stochastic nature of  
382 HIIT may govern its unique activation of PKC isoforms versus MICT. Furthermore, activation of the  
383 calcium-responsive CAMK2A, which is rapidly activated in human muscle in response to continuous  
384 exercise (Rose and Hargreaves, 2003; Rose et al., 2006), was differentially regulated by HIIT versus  
385 MICT (i.e., CAMK2A activity only increased by 5 min MICT). This suggests differential signaling  
386 mechanisms underlying calcium homeostasis during continuous versus interval exercise may contribute to  
387 HIIT's potent ability to stimulate mitochondrial biogenesis (Torma et al., 2019).

388 Rates of carbohydrate oxidation are increased, while rates of fat oxidation are reduced, in  
389 response to HIIT compared to MICT (Peake et al., 2014). HIIT increases levels of skeletal muscle glucose

390 transport, glycogenolysis and glycolysis, leading to accumulation of glycolytic products such as muscle  
391 lactate that can act as signaling molecules and influence exercise-regulated signaling networks within  
392 skeletal muscle, as well as be released into the bloodstream to facilitate interorgan communication with  
393 other tissues such as the heart, liver and brain (Brooks et al., 2023; Hargreaves and Spriet, 2020). Plasma  
394 lactate responses to HIIT in the present study were increased relative to MICT, with > 3000 phosphosites  
395 identified as being significantly correlated with the prevailing plasma lactate concentrations. Among the  
396 most highly correlated phosphosites with plasma lactate were PDHA1 S201 (**Figure 7A**) and TBC1D4  
397 S588 (**Figure 7D**) with annotated functional roles in the regulation of glycolysis and glucose transport,  
398 respectively. PDHA1 is a subunit of the PDH enzyme complex, which is regulated by pyruvate and ADP  
399 and becomes activated by calcium during exercise, serving as a key link between glycolysis and the  
400 tricarboxylic acid (TCA) cycle by converting pyruvate to acetyl-CoA (Hargreaves and Spriet, 2020).  
401 TBC1D4 is a key nexus in skeletal muscle glucose transport regulation via controlling glucose transporter  
402 GLUT4 translocation in response to insulin and muscle contraction during exercise (Cartee, 2015). Given  
403 the strong associations (i.e.,  $|r| > 0.80$ ) observed between plasma lactate concentrations and these key  
404 regulatory phosphosites in the present study, and in light of other studies investigating signaling-  
405 metabolite correlations in response to distinct exercise modalities and workloads (Blazev et al., 2022),  
406 these correlation data support the hypothesis that lactate accumulation in skeletal muscle and/or blood is a  
407 major driver of exercise intensity-specific physiological adaptations (MacInnis and Gibala, 2017).  
408 Collectively, differences in muscle and circulating metabolites and counterregulatory hormones in  
409 response to HIIT versus MICT may therefore influence metabolite-protein interactions during/after 10  
410 min of exercise, leading to exercise intensity-specific signaling events and unique physiological  
411 adaptations. In addition to increasing plasma lactate concentrations, the higher exercise intensity of HIIT  
412 versus MICT may also lead to differential muscle fiber type recruitment that in turn influences fiber type-  
413 specific signaling pathway responses such as AMPK (Kristensen et al., 2015), which were undetectable  
414 given the present study's focus on analyzing whole muscle biopsy samples.



415           There are several limitations of this first global study of the HIIT signaling network that warrant  
416 further investigation in future studies of human skeletal muscle exercise signaling. First, this study  
417 involved only male participants to allow us to benchmark observed signaling responses to previous  
418 studies investigating continuous exercise protocols in males. The acute responses of skeletal muscle to  
419 HIIT in female human participants remain uncharacterized and are being actively investigated in our  
420 ongoing research. The HIIT and MICT protocols utilized were selected based on the feasibility of  
421 untrained participants to complete each exercise bout. As a result, 5-10 min of HIIT or MICT at the  
422 prescribed intensities may not have engaged the full repertoire of shared and exercise intensity-specific  
423 signaling pathways in muscle and may require longer exercise durations in future studies. For example,  
424 patterns of substrate oxidation change during more prolonged exercise and differ between sexes, which  
425 may affect signaling responses more robustly between exercise intensities and/or sexes.

426           The signaling responses and programmed muscle adaptations to an acute bout of HIIT or MICT  
427 may also not be able to predict chronic training adaptations (Hawley et al., 2018). For example, recent  
428 transcriptomic and proteomic analyses of mammalian skeletal muscle have highlighted that acute changes  
429 may not be predictive of chronic exercise training-induced changes (Furrer et al., 2023b), such as HIIT-  
430 induced remodeling of the skeletal muscle proteome after repeated training (Hostrup et al., 2022;  
431 Robinson et al., 2017). Extensive total proteome analysis was not performed in this study, as only 5-10  
432 min of exercise has been previously observed to not affect total muscle protein content (Hoffman et al.,  
433 2015). While not analyzed, given the acute nature of the exercise bouts in this study, repeated HIIT  
434 training (i.e., six sessions per week for two weeks) can stimulate more robust mitochondrial adaptations  
435 (i.e., greater exercise-induced increases in citrate synthase maximal activity and mitochondrial  
436 respiration) compared to total work and duration-matched MICT in human skeletal muscle, suggesting  
437 that exercise intensity and/or the pattern of muscle contraction may drive peripheral adaptations to  
438 exercise (MacInnis et al., 2017). The amplification of human skeletal muscle signaling and mRNA  
439 responses underlying mitochondrial biogenesis in response to acute low-volume, high-intensity exercise  
440 may be due to more robust induction of metabolic stress relative to more prolonged, moderate-intensity

441 exercise (Fiorenza et al., 2018; MacInnis and Gibala, 2017). In this regard, it has been speculated that  
442 accumulation of skeletal muscle intracellular AMP, ADP, calcium and/or other metabolites such as lactate  
443 during HIIT intervals may differentially affect skeletal muscle signaling responses and adaptations to  
444 exercise such as mitochondrial biogenesis relative to continuous bouts of exercise (MacInnis et al., 2019).  
445 However, with repeated chronic HIIT versus MICT training, exercise training volume may become more  
446 important than intensity in increasing skeletal muscle mitochondrial content over time (Bishop et al.,  
447 2019).

448 Finally, the functional relevance of HIIT and/or MICT regulation of unique kinase activation  
449 patterns including isoform-specific PKC activation and novel HIIT-regulated phosphosites such as  
450 MTFP1 S128/S129 remains unknown. Functional validation experiments (e.g., target knockdown,  
451 overexpression and/or mutagenesis) in cellular and/or animal models are required to determine their  
452 respective roles in regulating exercise-induced muscle adaptations and molecular processes, such as  
453 MTFP1's potential functional role in regulating inner mitochondrial membrane fission/fusion in response  
454 to acute exercise. Regardless of these considerations, the present study has uncovered a previously  
455 unknown breadth of shared and exercise intensity-specific molecular machinery engaged by a single bout  
456 of HIIT versus MICT in untrained healthy males. Unique exercise signaling pathways and molecular  
457 transducers uncovered within these HIIT and MICT signaling networks can ultimately be leveraged and  
458 reinforced with longer interventions and/or repeated exercise training to stimulate cardiometabolic health-  
459 promoting effects and help combat a range of chronic metabolic conditions in populations with disease.

460

#### 461 **ACKNOWLEDGMENTS**

462 This work was supported by Australian Catholic University (ACU) research funding awarded to N.J.H.  
463 N.J.H. and J.A.H.'s research is partially funded by the Australian Government through the Australian  
464 Research Council (ARC) Discovery Project grant DP200103542, 'Molecular networks underlying  
465 exercise-induced mitochondrial biogenesis in humans'. B.L.P. is funded by an Australian National Health  
466 and Medical Research Council (NHMRC) Emerging Leader Investigator Grant (APP2009642). We are

467 grateful to all participants for their time and dedication to this study. We thank Andrew Garnham for  
468 performing muscle biopsy and blood sample collections, Rebecca Hall for dietary assistance, and Natalie  
469 Janzen, Mehdi Belhaj, Imre Kouw, Evelyn Parr and Marcus Callahan for laboratory support on trial days.  
470 Figures 1A and 2A were created with BioRender.com.

471

## 472 **AUTHOR CONTRIBUTIONS**

473 N.J.H. and J.A.H. conceptualized the study and provided intellectual input and financial support. N.J.H.,  
474 J.W. and B.E.R. conducted participant baseline measurements, exercise trials and sample collection.  
475 N.J.H., J.W. and B.E.R. performed skeletal muscle, blood and whole-body physiological data analysis.  
476 R.B. and B.L.P. performed MS sample preparation and phosphoproteomic analysis. D.X., V.S. and P.Y.  
477 performed bioinformatic analyses. N.J.H. wrote the manuscript, and all authors edited and approved the  
478 final version.

479

## 480 **DECLARATION OF INTERESTS**

481 The authors declare no competing interests.

482

## 483 **RESOURCE AVAILABILITY**

484 This article and its Supplemental Information include all datasets generated during this study. The MS  
485 phosphoproteomics data have been deposited to the ProteomeXchange Consortium via the PRIDE (Perez-  
486 Riverol et al., 2022) partner repository with the dataset identifier PXD053295 (Reviewer login details –  
487 Username: reviewer\_pxd053295@ebi.ac.uk; Password: 1PKEot15EUsc). Further information and  
488 requests for materials and resources including raw data, code and unique materials collected and used in  
489 this study should be directed to and will be fulfilled by the corresponding author and lead contact, Nolan  
490 J. Hoffman (nolan.hoffman@acu.edu.au).

491

492

493 **SUPPLEMENTAL INFORMATION TITLES AND LEGENDS**

494 **Supplemental Figure 1.** Protein modules showing distinct clusters of kinase-substrate signaling profiles  
495 in response to HIIT versus MICT.

496

497 **Supplemental Table 1.** Human skeletal muscle phosphopeptides identified and quantified using TMT  
498 labeling and following Perseus data processing.

499

500 **Supplemental Table 2.** Human skeletal muscle phosphosites identified and quantified following PhosR  
501 data normalization.

502

503 **Supplemental Table 3.** Human skeletal muscle differentially regulated phosphosites from each timepoint  
504 and exercise intensity.

505

506 **Supplemental Table 4.** Phosphosites significantly correlated with plasma lactate concentrations from  
507 each timepoint and exercise intensity.

508

509 **FIGURE LEGENDS**

510 **Figure 1. Preliminary testing and randomized crossover trial design, participant baseline**  
511 **characteristics, and plasma lactate and glucose responses to HIIT and MICT.** As detailed in the  
512 overall study schematic (A), participants first underwent preliminary testing and dietary control prior to  
513 each experimental HIIT or MICT trial day. Participants arrived at the laboratory following overnight  
514 fasting for baseline measurements, a dual-energy x-ray absorptiometry (DXA) body composition scan and  
515 resting metabolic rate (RMR) testing. Each participant then completed an incremental fitness test to  
516 volitional fatigue on a cycle ergometer to determine peak oxygen uptake ( $\dot{V}O_{2peak}$ ) and peak power  
517 output (PPO) to calculate the work rate for the subsequent two workload ( $67.9 \pm 10.2$  kJ) and total  
518 duration (10 min) matched HIIT and MICT exercise trials. Participants' food and fluid intake for all

519 meals and snacks was recorded over a three-day period using a mobile phone application and analyzed by  
520 an accredited research dietician. A standardized dinner was consumed by each participant the evening  
521 prior to each exercise trial, with no caffeine or alcohol consumed 24 h prior. In a randomized crossover  
522 design, participants were randomly assigned their first exercise trial (i.e., HIIT or MICT) prior to  
523 commencing trial days and did not perform any exercise in the 72 h prior to each trial day. HIIT and  
524 MICT exercise trials were separated by at least a 10-day recovery period. On each experimental day,  
525 participants reported to the laboratory following overnight fasting, and vastus lateralis skeletal muscle  
526 biopsies and venous blood samples were collected pre-exercise (0 min), mid-exercise (5 min) and  
527 immediately post-exercise (10 min). Participant characteristics are listed in (B). Plasma (C) lactate and  
528 (D) glucose concentrations in response to HIIT versus MICT were determined using a YSI Analyzer.  
529 Data are presented as mean  $\pm$  SD; two-way ANOVA with repeated measurements, Tukey's test for  
530 multiple comparisons; \*\*\*  $P < 0.001$  vs. 0 min; \*\*\*\*  $P < 0.0001$  vs. 0 min; #  $P < 0.05$  vs. 5 min; n=10  
531 for each exercise intensity and timepoint.

532

533 **Figure 2. Human skeletal muscle phosphoproteomic analysis reveals effective pre-exercise**  
534 **standardization and distinct signaling profile clusters in response to HIIT versus MICT after 5 and**  
535 **10 min.** Vastus lateralis skeletal muscle biopsies were collected pre-exercise (0 min), mid-exercise (5  
536 min) and immediately post-exercise (10 min) from each participant during the HIIT and MICT exercise  
537 trials (A). The 10-min HIIT cycling session consisted of alternating 1-min intervals at  $85 \pm 0.1\%$  of  
538 individual  $W_{max}$  ( $176 \pm 34$  W) and 1-min active recovery intervals at 50 W. The total duration- and  
539 work-matched MICT cycling session consisted of 10 min cycling at  $55 \pm 2\%$  of individual  $W_{max}$  ( $113 \pm$   
540  $17$  W). Each of the 60 total muscle biopsy samples were prepared and subjected to LC-MS/MS analysis  
541 to accurately identify and quantify skeletal muscle protein phosphorylation sites at 0 min (pre-exercise), 5  
542 min (mid-exercise) and 10 min (post-exercise) for both the HIIT and MICT exercise trials (A). Principal  
543 component analysis (B) and hierarchical clustering (C) of the phosphoproteomic datasets resulting from  
544 LC-MS/MS analysis of the 60 muscle biopsy samples was performed using the PhosR phosphoproteomic

545 data analysis package (Kim *et al.* 2021 *Cell Reports*). Each individual point (**B**) or line (**C**) represents a  
546 unique biological sample, and samples are color-coded by exercise intensity and timepoint. Overall, 19%  
547 of the total variance in the overall phosphoproteomic dataset was explained by principal component  
548 (PC)1, while PC2 explained 6% of the variance. The total number of phosphopeptides and phosphosites  
549 identified and quantified using MS are shown (**D**), in addition to the number of differentially regulated  
550 phosphosites (-/+ 1.5-fold change and adjusted  $P < 0.05$ ) from each timepoint and/or exercise intensity  
551 comparison (**E**).

552

553 **Figure 3. Human skeletal muscle phosphorylation sites differentially regulated by an acute bout of**  
554 **work- and duration-matched HIIT and/or MICT.** Volcano plots showing the median phosphopeptide  
555  $\log_2$  fold change (x-axis) are plotted against the  $-\log_{10} P$  value (y-axis) for each individual exercise  
556 intensity versus the respective timepoint (**A-F**). From the ~15,000 total phosphopeptides detected,  
557 significantly up-regulated (red dots) and down-regulated (blue dots) phosphosites are shown (-/+ 1.5-fold  
558 change and adjusted  $P < 0.05$ ), with black dots representing phosphosites that were detected but not  
559 significantly regulated by exercise. Volcano plots comparing signaling responses to each exercise  
560 intensity (i.e., HIIT versus MICT) at each timepoint are shown in **G-H**.

561

562 **Figure 4. Kinase and pathway enrichment uncovers common and unique kinases and pathways**  
563 **regulated by HIIT and/or MICT.** Kinase activity (**A**) was inferred via direction analysis using kinase  
564 perturbation analysis (KinasePA; (Yang *et al.*, 2016)) to annotate and visualize how kinases and their  
565 known substrates are perturbed by each exercise intensity and timepoint. Pathway enrichment analysis (**B**)  
566 was performed using the Reactome database (Joshi-Tope *et al.*, 2005) to determine biological pathways  
567 that are enriched within the lists of significantly regulated genes (corresponding to their respective  
568 phosphoproteins) for each exercise intensity and timepoint relative to its respective pre-exercise control.  
569 For kinase activity inference (**A**) and pathway enrichment (**B**), z-scores above and below the dotted lines  
570 (corresponding to  $|z \text{ score}| > 1.6$ ) were considered as increased or decreased by exercise, respectively.

571

572 **Figure 5. Kinase-substrate predictions and pathway enrichment analysis identify differential**  
573 **regulation of downstream substrates and pathways in response to HIIT versus MICT.** Kinase-  
574 substrate associations were predicted in response to HIIT and MICT via the phosphoproteome signaling  
575 profiles and kinase recognition motif of known substrates using PhosR (Kim et al., 2021a). This analysis  
576 generated predictions matrices, with columns corresponding to kinases, rows corresponding to  
577 phosphosites, and values in the heat maps denoting how likely a phosphosite is phosphorylated by a given  
578 kinase in response to HIIT (A) and MICT (B). Pathway enrichment analysis was performed using kinase-  
579 substrate predictions (i.e., phosphosites with a high prediction score for each kinase) to determine how  
580 kinases regulate common and/or distinct signaling pathways in response to HIIT (C) and MICT (D).

581

582 **Figure 6. Signalome network highlights distinct HIIT and MICT kinase clusters and differential**  
583 **signaling trajectories in response to each exercise intensity.** Signalome networks for HIIT (A) and  
584 MICT (B) exercise were constructed using the PhosR phosphoproteomic data analysis package (Kim et  
585 al., 2021a). This ‘signalome’ construction method utilized the phosphoproteome signaling profile and  
586 kinase recognition motif of known substrates to visualize the interaction of kinases and their collective  
587 actions on signal transduction. Kinases clustered together are highly correlated in terms of kinase-  
588 substrate predictions. Visualization of five phosphoprotein clusters from the phosphoproteomic dataset  
589 highlights distinct kinase-substrate regulation within the HIIT and MICT signaling networks, with shared  
590 and unique signaling trajectories shown for a panel of kinases in response to HIIT (C) and MICT (D).

591

592 **Figure 7. Correlation of HIIT and MICT phosphosites and plasma lactate levels identifies > 3,000**  
593 **lactate-correlated sites including functional phosphosites that govern protein activity and metabolic**  
594 **regulation.** Spearman correlation of individual phosphorylation sites (n=8,509 total) with plasma lactate  
595 concentrations at each timepoint and exercise intensity (n=60 total plasma samples analyzed) are shown  
596 for four of the most significantly correlated sites ( $q < 0.05$  with Benjamini Hochberg FDR) with

597 annotated functional roles in governing their respective phosphoprotein's activation state and regulating a  
598 range of key metabolic processes (e.g., glycolysis, glucose transport and mitochondrial biogenesis)  
599 including PDHA1 S201 (A), RPTOR S859 (B), TFEB S123/S128/S136 (C) and TBC1D4 S588 (D).

600

## 601 **METHODS**

### 602 **Ethical approval**

603 This study was approved by the Australian Catholic University Human Research Ethics Committee  
604 (approval number 2017-311H), prospectively registered with the Australian New Zealand Clinical Trials  
605 Registry (registration number ACTRN12619000819123) and conformed to the standards set by the  
606 Declaration of Helsinki. All participants completed medical history screening to ensure they were free  
607 from illness and injury and were informed of all experimental procedures and possible risks associated  
608 with this study prior to providing their informed consent.

609

### 610 **Human participants**

611 Ten healthy males aged 18-30 yr with a body mass index 18.5 – 27.0 kg/m<sup>2</sup> were recruited to participate  
612 in this study. Participant characteristics are shown in **Figure 1B**. Inclusion criteria were physical  
613 inactivity (i.e., inactive in terms of exercise training and job; < 150 min/wk moderate-intensity exercise;  
614 no structured physical activity for six months prior to recruitment), no cardiopulmonary abnormalities, no  
615 injuries, ability to pass the Exercise and Sport Science Australia (ESSA) pre-exercise screening tool  
616 and/or obtain general practitioner clearance to exercise, and ability to ride a stationary cycle at high  
617 intensity. Exclusion criteria were known cardiovascular disease or diabetes mellitus, major or chronic  
618 illness that impairs mobility and/or eating/digestion, taking prescription medications (i.e., beta-blockers,  
619 anti-arrhythmic drugs, statins, insulin sensitizing drugs, or drugs that increase the risk of bleeding  
620 [anticoagulants, antiplatelets, novel oral anticoagulants, nonsteroidal anti-inflammatory drugs, selective  
621 norepinephrine reuptake inhibitors, or selective serotonin reuptake inhibitors], or known bleeding disorder



622 (i.e., hemophilia A [factor VIII deficiency], von Willebrand disease, or other rare factor deficiencies  
623 including I, II, V, VII, X, XI, XII and XIII).

624

### 625 **Participant baseline measurements, exercise testing and familiarization**

626 Participants arrived at the laboratory following a 10-12 h overnight fast for dual-energy X-ray  
627 absorptiometry (DXA)-based body composition analysis (Lunar iDXA; GE HealthCare, Chicago, IL,  
628 USA). Upon arrival each participant's height and body mass were recorded, bladder was voided and any  
629 metal jewelry or clothing items containing metal were removed prior to DXA scanning. Next, resting  
630 metabolic rate (RMR) testing was performed using a calibrated TrueOne 2400 (Parvo Medics, Sandy, UT,  
631 USA) with expired air collected for a total of 25 min, including 10 min baseline measurement and 15 min  
632 data collection. Following RMR, resting blood pressure and heart rate were recorded in a seated position.

633       Following baseline measurements, each participant completed an incremental test to volitional  
634 fatigue on an electronically braked cycle ergometer (Lode Excalibur Sport; Lode, Groningen,  
635 Netherlands) to determine  $\dot{V}O_{2peak}$  and PPO. During the maximal exercise capacity test expired gas was  
636 collected every 30 s via open-circuit respirometry (TrueOne 2400; Parvo Medics) with continuous heart  
637 rate monitoring (Polar Heart Rate Monitor; Polar Electro, Kempele, Finland). Before each test, gas  
638 analyzers were calibrated with commercially available gases (16% O<sub>2</sub>, 4% CO<sub>2</sub>), and volume flow was  
639 calibrated using a 3L syringe. Following a 5-min warm up at 1 W/kg, resistance was increased by 25 W  
640 every 150 s until volitional fatigue, determined as the inability to maintain a cadence > 60 rpm. Individual  
641  $\dot{V}O_{2peak}$  and PPO were determined, with PPO calculated as  $W_{final} + (t/150 * 25)$  if the final stage was  
642 not completed, to calculate the work rate for subsequent work ( $67.9 \pm 10.2$  kJ) and duration (10 min)  
643 matched HIIT and MICT exercise trials. At least 72 h prior to the first randomized exercise trial,  
644 participants returned to the laboratory for exercise trial familiarization. Following a 5-min warmup at 1  
645 W/kg, participants completed two cycling-based exercise sessions consisting of a single bout of HIIT and  
646 MICT (10 min total each) to confirm their ability to successfully complete exercise trials at the prescribed  
647 intensities.

648

#### 649 **Dietary control and standardized meals**

650 Participants recorded dietary information using the Easy Diet Diary mobile phone application. Food and  
651 fluid intake for all meals and snacks was recorded over a three-day period and analyzed by an accredited  
652 research dietician. The habitual diet record and baseline DXA/RMR data were used to prescribe a  
653 standardized meal, which was provided with cooking instructions and consumed at the participant's home  
654 for dinner between 1800-2000 h before each trial day. The macronutrient composition of the standardized  
655 dinner was 50% carbohydrate, 30% fat and 20% protein. Participants refrained from consuming any other  
656 food or fluids other than water from 2000 h the evening prior to each trial. Participants also refrained  
657 from caffeine consumption after 1200 h and alcohol consumption and ibuprofen 24 h prior to each trial.

658

#### 659 **Exercise trials and skeletal muscle biopsy collection**

660 In a randomized crossover design, participants were assigned their first exercise trial (i.e., HIIT or MICT,  
661 with half of participants randomly assigned to perform the HIIT session first) prior to commencing trial  
662 days and did not perform any exercise in the 72 h prior to each trial day. The HIIT session consisted of 10  
663 min total cycling with 1-min intervals at  $85 \pm 0.1\%$  of individual PPO ( $176 \pm 34$  W) interspersed with 1-  
664 min active recovery intervals at 50 W. The MICT protocol was work- and duration-matched and consisted  
665 of an acute bout of continuous cycling at  $55 \pm 2\%$  of individual PPO ( $113 \pm 17$  W). A schematic of the  
666 overall study design is shown in **Figure 1A**. The two HIIT and MICT exercise trials were separated by  $\geq$   
667 10 days, and it was not possible to blind participants nor the principal researchers to the order of these  
668 trials.

669 On trial days participants arrived at the laboratory at 0700-0800 h, having fasted overnight since  
670 consuming the standardized dinner the evening prior, and only consumed water during the trials. Each  
671 participant's preferred arm was cannulated for blood collections (detailed below) and local anesthetic (1%  
672 lignocaine hydrochloride in saline; McFarlane; Surrey Hills, Victoria Australia; 11037-AS) was  
673 administered to the vastus lateralis by a highly experienced medical doctor. A percutaneous skeletal

674 muscle biopsy was collected at rest prior to commencing exercise (0 min) using a Bergstrom needle  
675 modified with suction and immediately snap-frozen, placed in liquid nitrogen and stored at -80 °C until  
676 analysis. Additional skeletal muscle biopsy samples were collected from each participant mid-exercise (5  
677 min) and immediately post-exercise (10 min), with the total 10 min cycling duration consistent for each  
678 exercise intensity. For the HIIT trial, the mid-exercise biopsy was collected during an active recovery  
679 interval on a bed placed directly behind the cycle ergometer (~30 sec), and participants re-commenced  
680 cycling immediately after the biopsy was collected. For the MICT trial, participants stopped cycling (~30  
681 sec) for the mid-exercise biopsy collection and re-commenced cycling immediately after the biopsy was  
682 collected.

683

#### 684 **Blood sampling and analyses**

685 Upon arrival to the laboratory, a cannula (22 G; Terumo, Tokyo, Japan) was inserted into an antecubital  
686 vein of each participant. Two vacutainers of venous blood (6 mL each) were collected via cannula at the  
687 same timepoints as skeletal muscle biopsies above, including pre-exercise (0 min), mid-exercise (5 min)  
688 and immediately post-exercise (10 min). Lipid panels (Roche Diagnostics, Basel, Switzerland;  
689 6380115190) including triglyceride, total cholesterol, high-density lipoproteins (HDL) and low-density  
690 lipoproteins (LDL) were immediately measured from an aliquot of whole blood (~19 µL) using the  
691 COBAS b 101 system (Roche Diagnostics). Following inversion ten times, one EDTA-coated vacutainer  
692 collected for plasma (Interpath, Somerton, Victoria, Australia; 454036) was immediately placed on ice,  
693 centrifuged at 1,500 x g for 10 min at 4 °C, aliquoted and stored at -80 °C until analysis. Simultaneous  
694 measurement of glucose and lactate from plasma aliquots was performed in duplicate using a calibrated  
695 YSI 2900 Biochemistry Analyzer (YSI Incorporated, Yellow Springs, OH, USA).

696

#### 697 **Phosphoproteomic sample preparation**

698 As depicted in **Figure 2A** and detailed below, proteins from each human skeletal muscle biopsy sample  
699 were extracted, digested to peptides with trypsin, and isobarically labeled prior to phosphopeptide

700 enrichment, fractionation and analysis by LC-MS/MS. Briefly, ~30 mg of each snap-frozen human  
701 skeletal muscle was lysed as previously described (Blazev et al., 2022) in 6 M guanidine HCL (Sigma, St.  
702 Louis, MO, USA; G4505) and 100 mM Tris pH 8.5 containing 10 mM tris(2-carboxyethyl)phosphine  
703 (Sigma; 75259) and 40 mM 2-chloroacetamide (Sigma; 22790) using tip-probe sonication. The resulting  
704 lysate was heated at 95 °C for 5 min and centrifuged at 20,000 x g for 10 min at 4 °C, and the resulting  
705 supernatant was diluted 1:1 with water and precipitated with 5 volumes of acetone at -20 °C overnight.  
706 Lysate was then centrifuged at 4,000 x g for 5 min at 4 °C and the protein pellet was resuspended in  
707 Digestion Buffer (10% 2,2,2-Trifluoroethanol (Sigma; 96924) in 100 mM HEPES pH 8.5). Protein  
708 content was determined using BCA (Thermo Fisher Scientific, Waltham, MA, USA). Four hundred µg  
709 protein (normalized to 100 µL final volume in Digestion Buffer) was digested with sequencing grade  
710 trypsin (Sigma; T6567) and LysC (Wako Chemicals, Richmond, VA, USA; 129-02541) at a 1:50  
711 enzyme:substrate ratio at 37 °C overnight with shaking at 2,000 rpm.

712         Digested peptides were labeled with 800 µg of 10-plex tandem mass tags (TMT) in 50%  
713 acetonitrile to a final volume of 200 µL at room temperature for 1.5 h. The TMT reaction was deacylated  
714 with 0.3% (w/v) of hydroxylamine for 10 min at room temperature and quenched to final volume of 1%  
715 trifluoroacetic acid (TFA). Each experiment consisting of 7 TMT labeled peptides (10 total experiments,  
716 each including all 6 timepoints from a single participant's HIIT and MICT trials and a pooled internal  
717 reference mix of peptides consisting of peptides from all 10 participants) was then pooled, resulting in a  
718 final amount of 4 mg peptide per TMT 10-plex experiment. The sample identity and labeling channels are  
719 uploaded as a table with the raw proteomic data to the ProteomeXchange Consortium via the PRIDE  
720 partner repository (see Resource Availability for login details).

721         Twenty µg of TMT-labeled peptide was removed for total proteome analysis (data not shown, as  
722 only 5-10 min of exercise does not affect total muscle protein content), and phosphopeptides were  
723 enriched from the remaining digestion of pooled peptides from each experiment using a modified version  
724 of the EasyPhos protocol (Humphrey et al., 2018). Briefly, samples were diluted to a final concentration  
725 of 50% isopropanol containing 5% TFA and 0.8 mM KH<sub>2</sub>PO<sub>4</sub>. Dilutions were then incubated with 15 mg

726 of TiO<sub>2</sub> beads (GL Sciences, Tokyo, Japan; 5010-21315) for 8 min at 40 °C with shaking at 2,000 rpm.  
727 Beads were washed four times with 60% isopropanol containing 5% TFA and resuspended in 60%  
728 isopropanol containing 0.1% TFA. The bead slurry was transferred to in-house packed C8 microcolumns  
729 (3M Empore; 11913614) and phosphopeptides were eluted with 40% acetonitrile containing 5%  
730 ammonium hydroxide. The enriched phosphopeptides and 20 µg aliquot for total proteome analysis were  
731 acidified to a final concentration of 1% TFA in 90% isopropanol and purified by in-house packed SDB-  
732 RPS (Sigma; 66886-U) microcolumns. The purified peptides and phosphopeptides were resuspended in  
733 2% acetonitrile in 0.1% TFA and stored at -80 °C prior to offline fractionation using neutral phase  
734 C18BEH HPLC as previously described (Blazev et al., 2022).

735

#### 736 **LC-MS/MS data acquisition and processing**

737 Peptides were analyzed on a Dionex 3500 nanoHPLC, coupled to an Orbitrap Eclipse mass spectrometer  
738 (Thermo Fisher Scientific) via electrospray ionization in positive mode with 1.9 kV at 275 °C and RF set  
739 to 30%. Separation was achieved on a 50 cm x 75 µm column (PepSep, Marslev, Denmark) packed with  
740 C18-AQ (1.9 µm; Dr Maisch, Ammerbuch, Germany) over 120 min at a flow rate of 300 nL/min. The  
741 peptides were eluted over a linear gradient of 3-40% Buffer B (Buffer A: 0.1% formic acid; Buffer B:  
742 80% acetonitrile, 0.1% v/v FA) and the column was maintained at 50 °C. The instrument was operated in  
743 data-dependent acquisition (DDA) mode with an MS1 spectrum acquired over the mass range 350-1,550  
744 m/z (120,000 resolution, 1 x 10<sup>6</sup> automatic gain control (AGC) and 50 ms maximum injection time)  
745 followed by MS/MS analysis with fixed cycle time of 3 s via HCD fragmentation mode and detection in  
746 the orbitrap (50,000 resolution, 1 x 10<sup>5</sup> AGC, 150 ms maximum injection time, and 0.7 m/z isolation  
747 width). Only ions with charge state 2-7 triggered MS/MS with peptide monoisotopic precursor selection  
748 and dynamic exclusion enabled for 30 s at 10 ppm.

749 DDA data were searched against the UniProt human database (June 2020; UP000005640\_9606  
750 and UP000005640\_9606\_additional) with MaxQuant v1.6.7.0 using default parameters with peptide  
751 spectral matches, peptide and protein FDR set to 1% (Cox and Mann, 2008). All data were searched with

752 oxidation of methionine set as a variable modification and cysteine carbamidomethylation set as a fixed  
753 modification. For analysis of phosphopeptides, phosphorylation of Serine, Threonine and Tyrosine was  
754 set as a variable modification, and for analysis of TMT-labeled peptides, TMT was added as a fixed  
755 modification to peptide N-termini and Lysine. First search MS1 mass tolerance was set to 20 ppm  
756 followed by recalibration and main search MS1 tolerance set to 4.5 ppm, while MS/MS mass tolerance  
757 was set to 20 ppm. MaxQuant output data were initially processed with Perseus (Tyanova et al., 2016) to  
758 remove decoy data, potential contaminants and proteins only identified with a single peptide containing  
759 oxidized methionine. The ‘Expand Site’ function was additionally used for phosphoproteomic data to  
760 account for multi-phosphorylated peptides prior to statistical analysis.

761

## 762 **Bioinformatic analysis**

763 For analysis of human muscle phosphopeptides with TMT-based quantification, data were first  $\log_2$   
764 transformed and each phosphosite abundance was corrected by subtracting the abundance of the pooled  
765 sample in the same TMT batch. The phosphoproteomic data were processed using the pipeline  
766 implemented in the PhosR package (Kim et al., 2021a). Filtering was performed to retain phosphosites  
767 present in at least three participants (out of ten total participants), in at least one timepoint (out of six total  
768 timepoints). Missing values in the retained phosphosites were imputed first by a site- and sample  
769 condition-specific imputation method, where for a phosphosite that contains missing values in a  
770 condition, if more than three samples were quantified in that condition, the missing values were imputed  
771 based on these quantified values for that phosphosite in that condition, and then by a random-tail  
772 imputation method (Kim et al., 2021b). The imputed data were normalized using ‘Combat’ function in  
773 sva package (Johnson et al., 2007) for removing batch effects and then ‘RUVphospho’ function in PhosR  
774 for the removal of additional unwanted variation with a set of stably phosphorylated sites as negative  
775 controls (Xiao et al., 2022). The batch-corrected data were further converted to ratios relative to the pre-  
776 exercise samples (i.e., ‘0 min’ controls).

777 Differentially phosphorylated sites were identified using limma R package (Ritchie et al., 2015).  
778 Phosphosites with  $\pm$  1.5-fold change and FDR-adjusted  $P$  value  $< 0.05$  were considered as differentially  
779 phosphorylated (**Figure 3A-H**). Kinase activities at post- or mid-exercise for both HIIT and MICT were  
780 inferred based on the changes in phosphorylation (relative to the corresponding pre-exercise control  
781 samples) of their known substrates using the KinasePA package (Yang et al., 2016) and the  
782 PhosphoSitePlus annotation database (Hornbeck et al., 2012) (**Figure 4A**). Pathway enrichment analysis  
783 was then performed, whereby phosphosites were first summarised into their host protein levels by taking  
784 the maximum  $\log_2$  fold change for each comparison between conditions, and then the pathway enrichment  
785 was performed based on the inferred host protein changes using the KinasePA package and Reactome  
786 database (Joshi-Tope et al., 2005) (**Figure 4B**).

787 Putative substrates of kinases for HIIT and MICT were predicted using the  
788 ‘kinaseSubstrateScore’ function in the PhosR package, and the results were represented as heatmaps  
789 (**Figure 5A-B**). Pathway over-representation analysis was performed on protein sets identified from the  
790 kinase-substrate scoring analysis (i.e., kinase-substrate pairs with score  $> 0.85$  were selected) per kinase  
791 using the ‘enrichKEGG’ function implemented in the clusterProfiler R package (Yu et al., 2012), and  $P$   
792 values were adjusted for multiple testing using Benjamini Hochberg FDR correction at  $\alpha = 0.05$  (**Figure**  
793 **5C-D**). The prediction scores were subsequently used for constructing signalome networks. Pearson’s  
794 correlation was performed on pairwise kinases, and then the correlation matrix was binarized based on the  
795 correlation score threshold of 0.85. Undirected graphs were built from the binary adjacency matrix using  
796 the ‘graph\_from\_adjacency\_matrix’ function from the igraph package (Csárdi G, 2024), and results from  
797 this analysis were presented as network diagrams (**Figure 6A-B**).

798 Five protein modules were identified by clustering proteins with phosphosites sharing similar  
799 dynamic phosphorylation profiles and kinase regulation across both HIIT and MICT. The proportion of  
800 phosphosites that were phosphorylated by kinases for each protein module was calculated and presented  
801 as bubble plots (**Figure 6C-D**). The activity of each protein module was then inferred. The regulated  
802 phosphosites were first obtained across all conditions (i.e., ANOVA test with adjusted  $P < 0.05$ ), and the

803 average log<sub>2</sub> fold change of the regulated phosphosites for each of the five modules (relative to the  
804 corresponding pre-exercise control) were calculated (**Supplemental Figure 1A-E**).

805

## 806 **Statistical analysis**

807 Statistical analysis of plasma lactate and glucose concentrations was performed using GraphPad Prism  
808 (version 9.4). A two-way ANOVA with repeated measurements was used to determine the effects of time  
809 and exercise intensity, with Tukey's test applied for multiple comparisons ( $P < 0.05$  considered as  
810 significant; sample size and statistical parameters reported in the **Figure 1** legend). Spearman correlation  
811 of individual phosphorylation sites with plasma lactate concentrations at each timepoint and exercise  
812 intensity was performed to determine significantly correlated phosphosites, with Benjamini Hochberg  
813 false discovery rate applied ( $q < 0.05$  considered as significant; sample size and statistical parameters  
814 reported in the **Figure 7** legend).

815

## 816 **REFERENCES**

- 817 Bartlett, J.D., Hwa Joo, C., Jeong, T.S., Louhelainen, J., Cochran, A.J., Gibala, M.J., Gregson, W., Close,  
818 G.L., Drust, B., and Morton, J.P. (2012). Matched work high-intensity interval and continuous running  
819 induce similar increases in PGC-1alpha mRNA, AMPK, p38, and p53 phosphorylation in human skeletal  
820 muscle. *J Appl Physiol* (1985) *112*, 1135-1143.
- 821 Bishop, D.J., Botella, J., and Granata, C. (2019). CrossTalk opposing view: Exercise training volume is  
822 more important than training intensity to promote increases in mitochondrial content. *J Physiol* *597*, 4115-  
823 4118.
- 824 Blazev, R., Carl, C.S., Ng, Y.K., Molendijk, J., Voldstedlund, C.T., Zhao, Y., Xiao, D., Kueh, A.J., Miotto,  
825 P.M., Haynes, V.R., *et al.* (2022). Phosphoproteomics of three exercise modalities identifies canonical  
826 signaling and C18ORF25 as an AMPK substrate regulating skeletal muscle function. *Cell Metab* *34*, 1561-  
827 1577 e1569.
- 828 Brooks, G.A., Osmond, A.D., Arevalo, J.A., Duong, J.J., Curl, C.C., Moreno-Santillan, D.D., and Leija,  
829 R.G. (2023). Lactate as a myokine and exerkine: drivers and signals of physiology and metabolism. *J Appl*  
830 *Physiol* (1985) *134*, 529-548.
- 831 Campbell, W.W., Kraus, W.E., Powell, K.E., Haskell, W.L., Janz, K.F., Jakicic, J.M., Troiano, R.P., Sprow,  
832 K., Torres, A., Piercy, K.L., *et al.* (2019). High-Intensity Interval Training for Cardiometabolic Disease  
833 Prevention. *Med Sci Sports Exerc* *51*, 1220-1226.



- 834 Cartee, G.D. (2015). Roles of TBC1D1 and TBC1D4 in insulin- and exercise-stimulated glucose transport  
835 of skeletal muscle. *Diabetologia* 58, 19-30.
- 836 Cochran, A.J., Percival, M.E., Tricarico, S., Little, J.P., Cermak, N., Gillen, J.B., Tarnopolsky, M.A., and  
837 Gibala, M.J. (2014). Intermittent and continuous high-intensity exercise training induce similar acute but  
838 different chronic muscle adaptations. *Exp Physiol* 99, 782-791.
- 839 Combes, A., Dekerle, J., Webborn, N., Watt, P., Bougault, V., and Daussin, F.N. (2015). Exercise-induced  
840 metabolic fluctuations influence AMPK, p38-MAPK and CaMKII phosphorylation in human skeletal  
841 muscle. *Physiol Rep* 3.
- 842 Cox, J., and Mann, M. (2008). MaxQuant enables high peptide identification rates, individualized p.p.b.-  
843 range mass accuracies and proteome-wide protein quantification. *Nat Biotechnol* 26, 1367-1372.
- 844 Csárdi G, N.T., Traag V, Horvát S, Zanini F, Noom D, Müller K (2024). *igraph: Network Analysis and*  
845 *Visualization in R*.
- 846 Ducommun, S., Deak, M., Zeigerer, A., Goransson, O., Seitz, S., Collodet, C., Madsen, A.B., Jensen, T.E.,  
847 Viollet, B., Foretz, M., *et al.* (2019). Chemical genetic screen identifies Gapex-5/GAPVD1 and STBD1 as  
848 novel AMPK substrates. *Cell Signal* 57, 45-57.
- 849 Egan, B., and Zierath, J.R. (2013). Exercise metabolism and the molecular regulation of skeletal muscle  
850 adaptation. *Cell Metab* 17, 162-184.
- 851 Fiorenza, M., Gunnarsson, T.P., Hostrup, M., Iaia, F.M., Schena, F., Pilegaard, H., and Bangsbo, J. (2018).  
852 Metabolic stress-dependent regulation of the mitochondrial biogenic molecular response to high-intensity  
853 exercise in human skeletal muscle. *J Physiol* 596, 2823-2840.
- 854 Furrer, R., Hawley, J.A., and Handschin, C. (2023a). The molecular athlete: exercise physiology from  
855 mechanisms to medals. *Physiol Rev* 103, 1693-1787.
- 856 Furrer, R., Heim, B., Schmid, S., Dilbaz, S., Adak, V., Nordstrom, K.J.V., Ritz, D., Steurer, S.A., Walter,  
857 J., and Handschin, C. (2023b). Molecular control of endurance training adaptation in male mouse skeletal  
858 muscle. *Nat Metab* 5, 2020-2035.
- 859 Gibala, M.J., and Hawley, J.A. (2017). Sprinting Toward Fitness. *Cell Metab* 25, 988-990.
- 860 Gibala, M.J., Little, J.P., Macdonald, M.J., and Hawley, J.A. (2012). Physiological adaptations to low-  
861 volume, high-intensity interval training in health and disease. *J Physiol* 590, 1077-1084.
- 862 Gibala, M.J., McGee, S.L., Garnham, A.P., Howlett, K.F., Snow, R.J., and Hargreaves, M. (2009). Brief  
863 intense interval exercise activates AMPK and p38 MAPK signaling and increases the expression of PGC-  
864 1alpha in human skeletal muscle. *J Appl Physiol* (1985) 106, 929-934.
- 865 Hargreaves, M., and Spriet, L.L. (2020). Skeletal muscle energy metabolism during exercise. *Nat Metab* 2,  
866 817-828.
- 867 Hawley, J.A., Hargreaves, M., Joyner, M.J., and Zierath, J.R. (2014). Integrative biology of exercise. *Cell*  
868 159, 738-749.
- 869 Hawley, J.A., Lundby, C., Cotter, J.D., and Burke, L.M. (2018). Maximizing Cellular Adaptation to  
870 Endurance Exercise in Skeletal Muscle. *Cell Metab* 27, 962-976.

- 871 Hoffman, N.J. (2017). Omics and Exercise: Global Approaches for Mapping Exercise Biological Networks.  
872 Cold Spring Harb Perspect Med 7.
- 873 Hoffman, N.J., Parker, B.L., Chaudhuri, R., Fisher-Wellman, K.H., Kleinert, M., Humphrey, S.J., Yang,  
874 P., Holliday, M., Trefely, S., Fazakerley, D.J., *et al.* (2015). Global Phosphoproteomic Analysis of Human  
875 Skeletal Muscle Reveals a Network of Exercise-Regulated Kinases and AMPK Substrates. *Cell Metab* 22,  
876 922-935.
- 877 Hornbeck, P.V., Kornhauser, J.M., Tkachev, S., Zhang, B., Skrzypek, E., Murray, B., Latham, V., and  
878 Sullivan, M. (2012). PhosphoSitePlus: a comprehensive resource for investigating the structure and  
879 function of experimentally determined post-translational modifications in man and mouse. *Nucleic Acids*  
880 *Res* 40, D261-270.
- 881 Hostrup, M., Lemminger, A.K., Stocks, B., Gonzalez-Franquesa, A., Larsen, J.K., Quesada, J.P.,  
882 Thomassen, M., Weinert, B.T., Bangsbo, J., and Deshmukh, A.S. (2022). High-intensity interval training  
883 remodels the proteome and acetylome of human skeletal muscle. *Elife* 11.
- 884 Humphrey, S.J., Karayel, O., James, D.E., and Mann, M. (2018). High-throughput and high-sensitivity  
885 phosphoproteomics with the EasyPhos platform. *Nat Protoc* 13, 1897-1916.
- 886 Johnson, W.E., Li, C., and Rabinovic, A. (2007). Adjusting batch effects in microarray expression data  
887 using empirical Bayes methods. *Biostatistics* 8, 118-127.
- 888 Joshi-Tope, G., Gillespie, M., Vastrik, I., D'Eustachio, P., Schmidt, E., de Bono, B., Jassal, B., Gopinath,  
889 G.R., Wu, G.R., Matthews, L., *et al.* (2005). Reactome: a knowledgebase of biological pathways. *Nucleic*  
890 *Acids Res* 33, D428-432.
- 891 Kim, H.J., Kim, T., Hoffman, N.J., Xiao, D., James, D.E., Humphrey, S.J., and Yang, P. (2021a). PhosR  
892 enables processing and functional analysis of phosphoproteomic data. *Cell Rep* 34, 108771.
- 893 Kim, H.J., Kim, T., Xiao, D., and Yang, P. (2021b). Protocol for the processing and downstream analysis  
894 of phosphoproteomic data with PhosR. *STAR Protoc* 2, 100585.
- 895 Kristensen, D.E., Albers, P.H., Prats, C., Baba, O., Birk, J.B., and Wojtaszewski, J.F. (2015). Human  
896 muscle fibre type-specific regulation of AMPK and downstream targets by exercise. *J Physiol* 593, 2053-  
897 2069.
- 898 Little, J.P., Safdar, A., Bishop, D., Tarnopolsky, M.A., and Gibala, M.J. (2011). An acute bout of high-  
899 intensity interval training increases the nuclear abundance of PGC-1alpha and activates mitochondrial  
900 biogenesis in human skeletal muscle. *Am J Physiol Regul Integr Comp Physiol* 300, R1303-1310.
- 901 MacInnis, M.J., and Gibala, M.J. (2017). Physiological adaptations to interval training and the role of  
902 exercise intensity. *J Physiol* 595, 2915-2930.
- 903 MacInnis, M.J., Skelly, L.E., and Gibala, M.J. (2019). CrossTalk proposal: Exercise training intensity is  
904 more important than volume to promote increases in human skeletal muscle mitochondrial content. *J*  
905 *Physiol* 597, 4111-4113.
- 906 MacInnis, M.J., Zacharewicz, E., Martin, B.J., Haikalis, M.E., Skelly, L.E., Tarnopolsky, M.A., Murphy,  
907 R.M., and Gibala, M.J. (2017). Superior mitochondrial adaptations in human skeletal muscle after interval  
908 compared to continuous single-leg cycling matched for total work. *J Physiol* 595, 2955-2968.

- 909 McConell, G.K., Lee-Young, R.S., Chen, Z.P., Stepto, N.K., Huynh, N.N., Stephens, T.J., Canny, B.J., and  
910 Kemp, B.E. (2005). Short-term exercise training in humans reduces AMPK signalling during prolonged  
911 exercise independent of muscle glycogen. *J Physiol* *568*, 665-676.
- 912 Milanovic, Z., Sporis, G., and Weston, M. (2015). Effectiveness of High-Intensity Interval Training (HIT)  
913 and Continuous Endurance Training for VO<sub>2</sub>max Improvements: A Systematic Review and Meta-Analysis  
914 of Controlled Trials. *Sports Med* *45*, 1469-1481.
- 915 Morita, M., Prudent, J., Basu, K., Goyon, V., Katsumura, S., Hulea, L., Pearl, D., Siddiqui, N., Strack, S.,  
916 McGuirk, S., *et al.* (2017). mTOR Controls Mitochondrial Dynamics and Cell Survival via MTFP1. *Mol*  
917 *Cell* *67*, 922-935 e925.
- 918 Nsiah-Sefaa, A., Brown, E.L., Russell, A.P., and Foletta, V.C. (2014). New gene targets of PGC-1alpha  
919 and ERRalpha co-regulation in C2C12 myotubes. *Mol Biol Rep* *41*, 8009-8017.
- 920 Patitucci, C., Hernandez-Camacho, J.D., Vimont, E., Yde, S., Cokelaer, T., Chaze, T., Giai Gianetto, Q.,  
921 Matondo, M., Gazi, A., Nemazanyy, I., *et al.* (2023). Mtfp1 ablation enhances mitochondrial respiration  
922 and protects against hepatic steatosis. *Nat Commun* *14*, 8474.
- 923 Peake, J.M., Tan, S.J., Markworth, J.F., Broadbent, J.A., Skinner, T.L., and Cameron-Smith, D. (2014).  
924 Metabolic and hormonal responses to isoenergetic high-intensity interval exercise and continuous  
925 moderate-intensity exercise. *Am J Physiol Endocrinol Metab* *307*, E539-552.
- 926 Perez-Riverol, Y., Bai, J., Bandla, C., Garcia-Seisdedos, D., Hewapathirana, S., Kamatchinathan, S.,  
927 Kundu, D.J., Prakash, A., Frericks-Zipper, A., Eisenacher, M., *et al.* (2022). The PRIDE database resources  
928 in 2022: a hub for mass spectrometry-based proteomics evidences. *Nucleic Acids Res* *50*, D543-D552.
- 929 Perrini, S., Henriksson, J., Zierath, J.R., and Widegren, U. (2004). Exercise-induced protein kinase C  
930 isoform-specific activation in human skeletal muscle. *Diabetes* *53*, 21-24.
- 931 Perry, C.G., Lally, J., Holloway, G.P., Heigenhauser, G.J., Bonen, A., and Spriet, L.L. (2010). Repeated  
932 transient mRNA bursts precede increases in transcriptional and mitochondrial proteins during training in  
933 human skeletal muscle. *J Physiol* *588*, 4795-4810.
- 934 Pileggi, C.A., Hedges, C.P., D'Souza, R.F., Durainayagam, B.R., Zeng, N., Figueiredo, V.C., Hickey,  
935 A.J.R., Mitchell, C.J., and Cameron-Smith, D. (2023). Minimal adaptation of the molecular regulators of  
936 mitochondrial dynamics in response to unilateral limb immobilisation and retraining in middle-aged men.  
937 *Eur J Appl Physiol* *123*, 249-260.
- 938 Reisman, E.G., Hawley, J.A., and Hoffman, N.J. (2024). Exercise-Regulated Mitochondrial and Nuclear  
939 Signalling Networks in Skeletal Muscle. *Sports Med*.
- 940 Richter, E.A., Vistisen, B., Maarbjerg, S.J., Sajan, M., Farese, R.V., and Kiens, B. (2004). Differential  
941 effect of bicycling exercise intensity on activity and phosphorylation of atypical protein kinase C and  
942 extracellular signal-regulated protein kinase in skeletal muscle. *J Physiol* *560*, 909-918.
- 943 Ritchie, M.E., Phipson, B., Wu, D., Hu, Y., Law, C.W., Shi, W., and Smyth, G.K. (2015). limma powers  
944 differential expression analyses for RNA-sequencing and microarray studies. *Nucleic Acids Res* *43*, e47.
- 945 Robinson, M.M., Dasari, S., Konopka, A.R., Johnson, M.L., Manjunatha, S., Esponda, R.R., Carter, R.E.,  
946 Lanza, I.R., and Nair, K.S. (2017). Enhanced Protein Translation Underlies Improved Metabolic and

- 947 Physical Adaptations to Different Exercise Training Modes in Young and Old Humans. *Cell Metab* 25,  
948 581-592.
- 949 Rose, A.J., and Hargreaves, M. (2003). Exercise increases Ca<sup>2+</sup>-calmodulin-dependent protein kinase II  
950 activity in human skeletal muscle. *J Physiol* 553, 303-309.
- 951 Rose, A.J., Kiens, B., and Richter, E.A. (2006). Ca<sup>2+</sup>-calmodulin-dependent protein kinase expression and  
952 signalling in skeletal muscle during exercise. *J Physiol* 574, 889-903.
- 953 Rose, A.J., Michell, B.J., Kemp, B.E., and Hargreaves, M. (2004). Effect of exercise on protein kinase C  
954 activity and localization in human skeletal muscle. *J Physiol* 561, 861-870.
- 955 Sollanek, K.J., Burniston, J.G., Kavazis, A.N., Morton, A.B., Wiggs, M.P., Ahn, B., Smuder, A.J., and  
956 Powers, S.K. (2017). Global Proteome Changes in the Rat Diaphragm Induced by Endurance Exercise  
957 Training. *PLoS One* 12, e0171007.
- 958 Tilokani, L., Russell, F.M., Hamilton, S., Virga, D.M., Segawa, M., Paupe, V., Gruszczuk, A.V., Protasoni,  
959 M., Tabara, L.C., Johnson, M., *et al.* (2022). AMPK-dependent phosphorylation of MTFR1L regulates  
960 mitochondrial morphology. *Sci Adv* 8, eabo7956.
- 961 Torma, F., Gombos, Z., Jokai, M., Takeda, M., Mimura, T., and Radak, Z. (2019). High intensity interval  
962 training and molecular adaptive response of skeletal muscle. *Sports Med Health Sci* 1, 24-32.
- 963 Trewin, A.J., Parker, L., Shaw, C.S., Hiam, D.S., Garnham, A., Levinger, I., McConell, G.K., and Stepto,  
964 N.K. (2018). Acute HIIE elicits similar changes in human skeletal muscle mitochondrial H<sub>2</sub>O<sub>2</sub> release,  
965 respiration, and cell signaling as endurance exercise even with less work. *Am J Physiol Regul Integr Comp*  
966 *Physiol* 315, R1003-R1016.
- 967 Tyanova, S., Temu, T., Sinitcyn, P., Carlson, A., Hein, M.Y., Geiger, T., Mann, M., and Cox, J. (2016).  
968 The Perseus computational platform for comprehensive analysis of (prote)omics data. *Nat Methods* 13,  
969 731-740.
- 970 Xiao, D., Kim, H.J., Pang, I., and Yang, P. (2022). Functional analysis of the stable phosphoproteome  
971 reveals cancer vulnerabilities. *Bioinformatics* 38, 1956-1963.
- 972 Yang, P., Patrick, E., Humphrey, S.J., Ghazanfar, S., James, D.E., Jothi, R., and Yang, J.Y. (2016).  
973 KinasePA: Phosphoproteomics data annotation using hypothesis driven kinase perturbation analysis.  
974 *Proteomics* 16, 1868-1871.
- 975 Yu, G., Wang, L.G., Han, Y., and He, Q.Y. (2012). clusterProfiler: an R package for comparing biological  
976 themes among gene clusters. *OMICS* 16, 284-287.
- 977 Yu, M., Stepto, N.K., Chibalin, A.V., Fryer, L.G., Carling, D., Krook, A., Hawley, J.A., and Zierath, J.R.  
978 (2003). Metabolic and mitogenic signal transduction in human skeletal muscle after intense cycling  
979 exercise. *J Physiol* 546, 327-335.
- 980

**Figure 1**

**A**

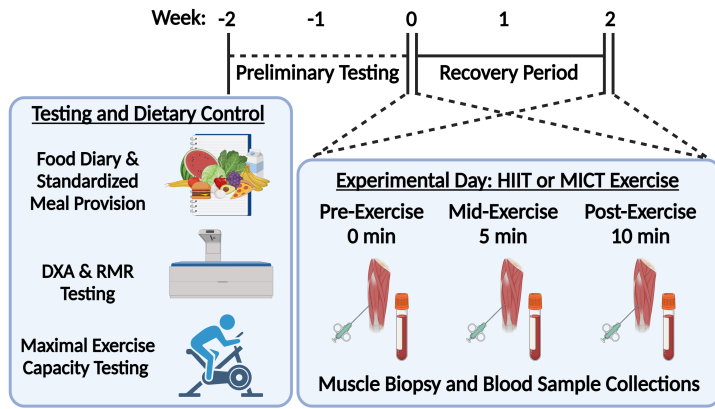

**B**

| Participant Characteristic                | Mean ± Standard Deviation |
|-------------------------------------------|---------------------------|
| Number of participants                    | 10 (males)                |
| Age (years)                               | 25.4 ± 3.2                |
| Height (cm)                               | 176.7 ± 7.2               |
| Body mass (kg)                            | 75.7 ± 8.7                |
| Body mass index (BMI; kg/m <sup>2</sup> ) | 23.5 ± 1.6                |
| Fat mass (kg)                             | 15.0 ± 4.2                |
| Lean mass (kg)                            | 57.6 ± 7.3                |
| Resting metabolic rate (kcal/d)           | 1770.1 ± 185.7            |
| Absolute $\dot{V}O_{2peak}$ (L/min)       | 2.8 ± 0.4                 |
| Relative $\dot{V}O_{2peak}$ (mL/kg/min)   | 37.9 ± 5.2                |
| Peak power output (W)                     | 208 ± 40                  |
| Resting heart rate (beats per minute)     | 61.6 ± 5.0                |
| Systolic blood pressure (mmHg)            | 121.1 ± 12.8              |
| Diastolic blood pressure (mmHg)           | 76.6 ± 9.9                |
| Triglycerides (whole blood; mmol/L)       | 1.5 ± 1.1                 |
| Total cholesterol (whole blood; mmol/L)   | 3.8 ± 0.6                 |
| LDL cholesterol (whole blood; mmol/L)     | 2.1 ± 0.5                 |
| HDL cholesterol (whole blood; mmol/L)     | 1.2 ± 0.2                 |

**C**

Main Effect of Time: \*\*\*\*  $P < 0.0001$   
 Main Effect of HIIT vs. MICT: \*  $P < 0.05$

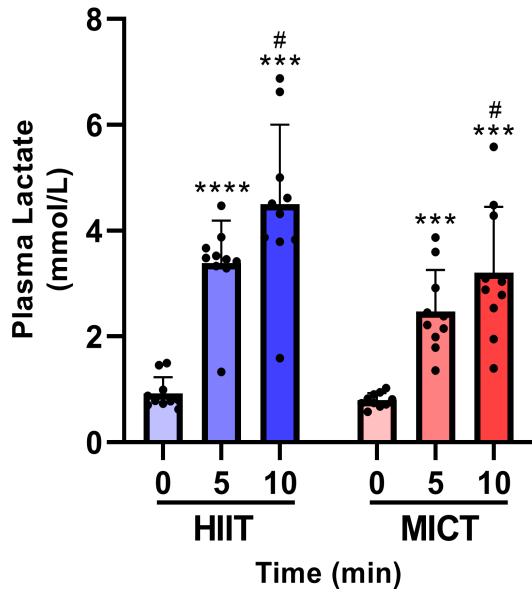

**D**

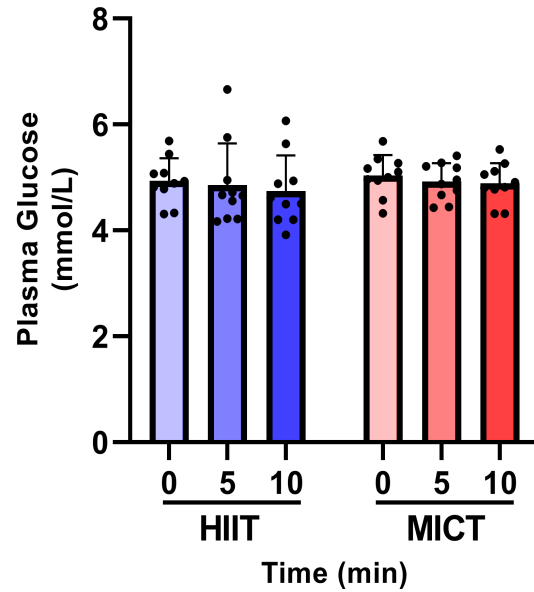

## Figure 2

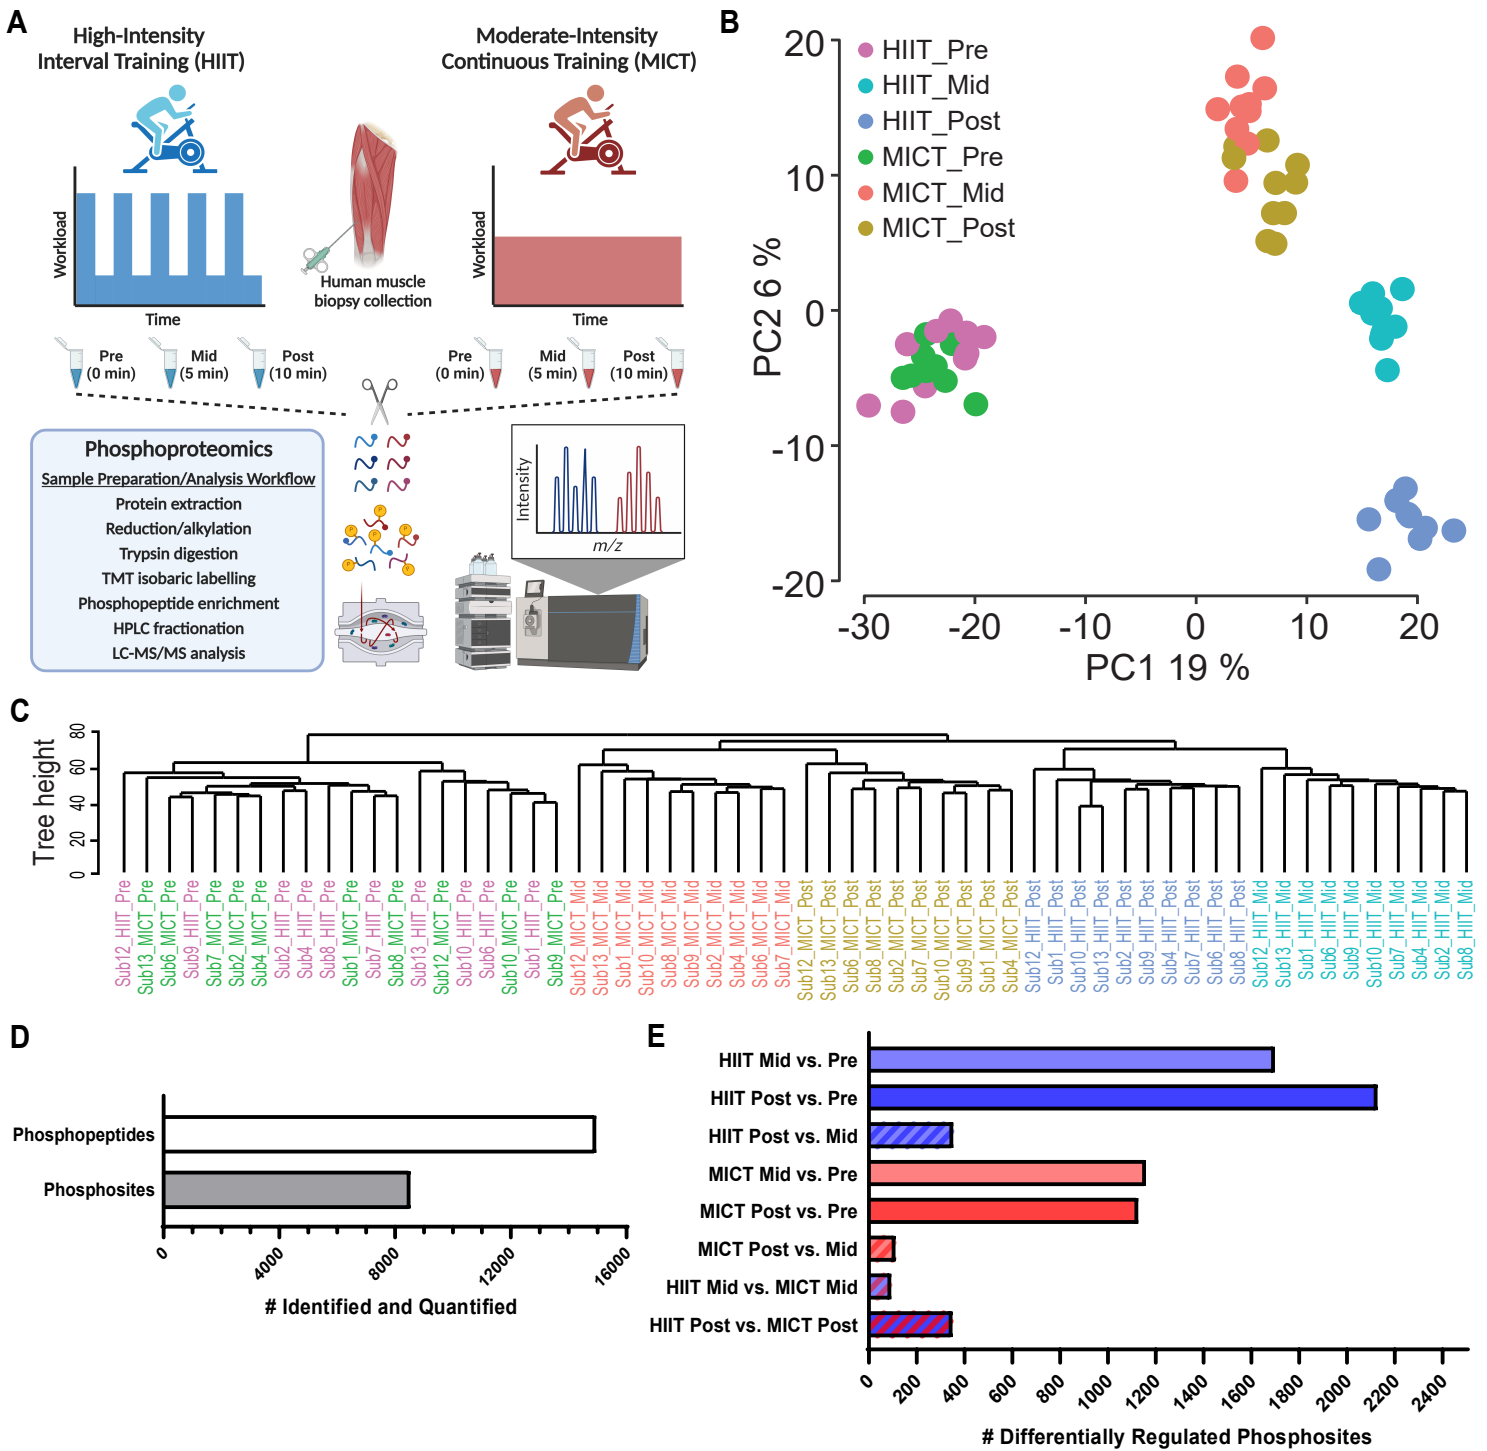

**Figure 3**

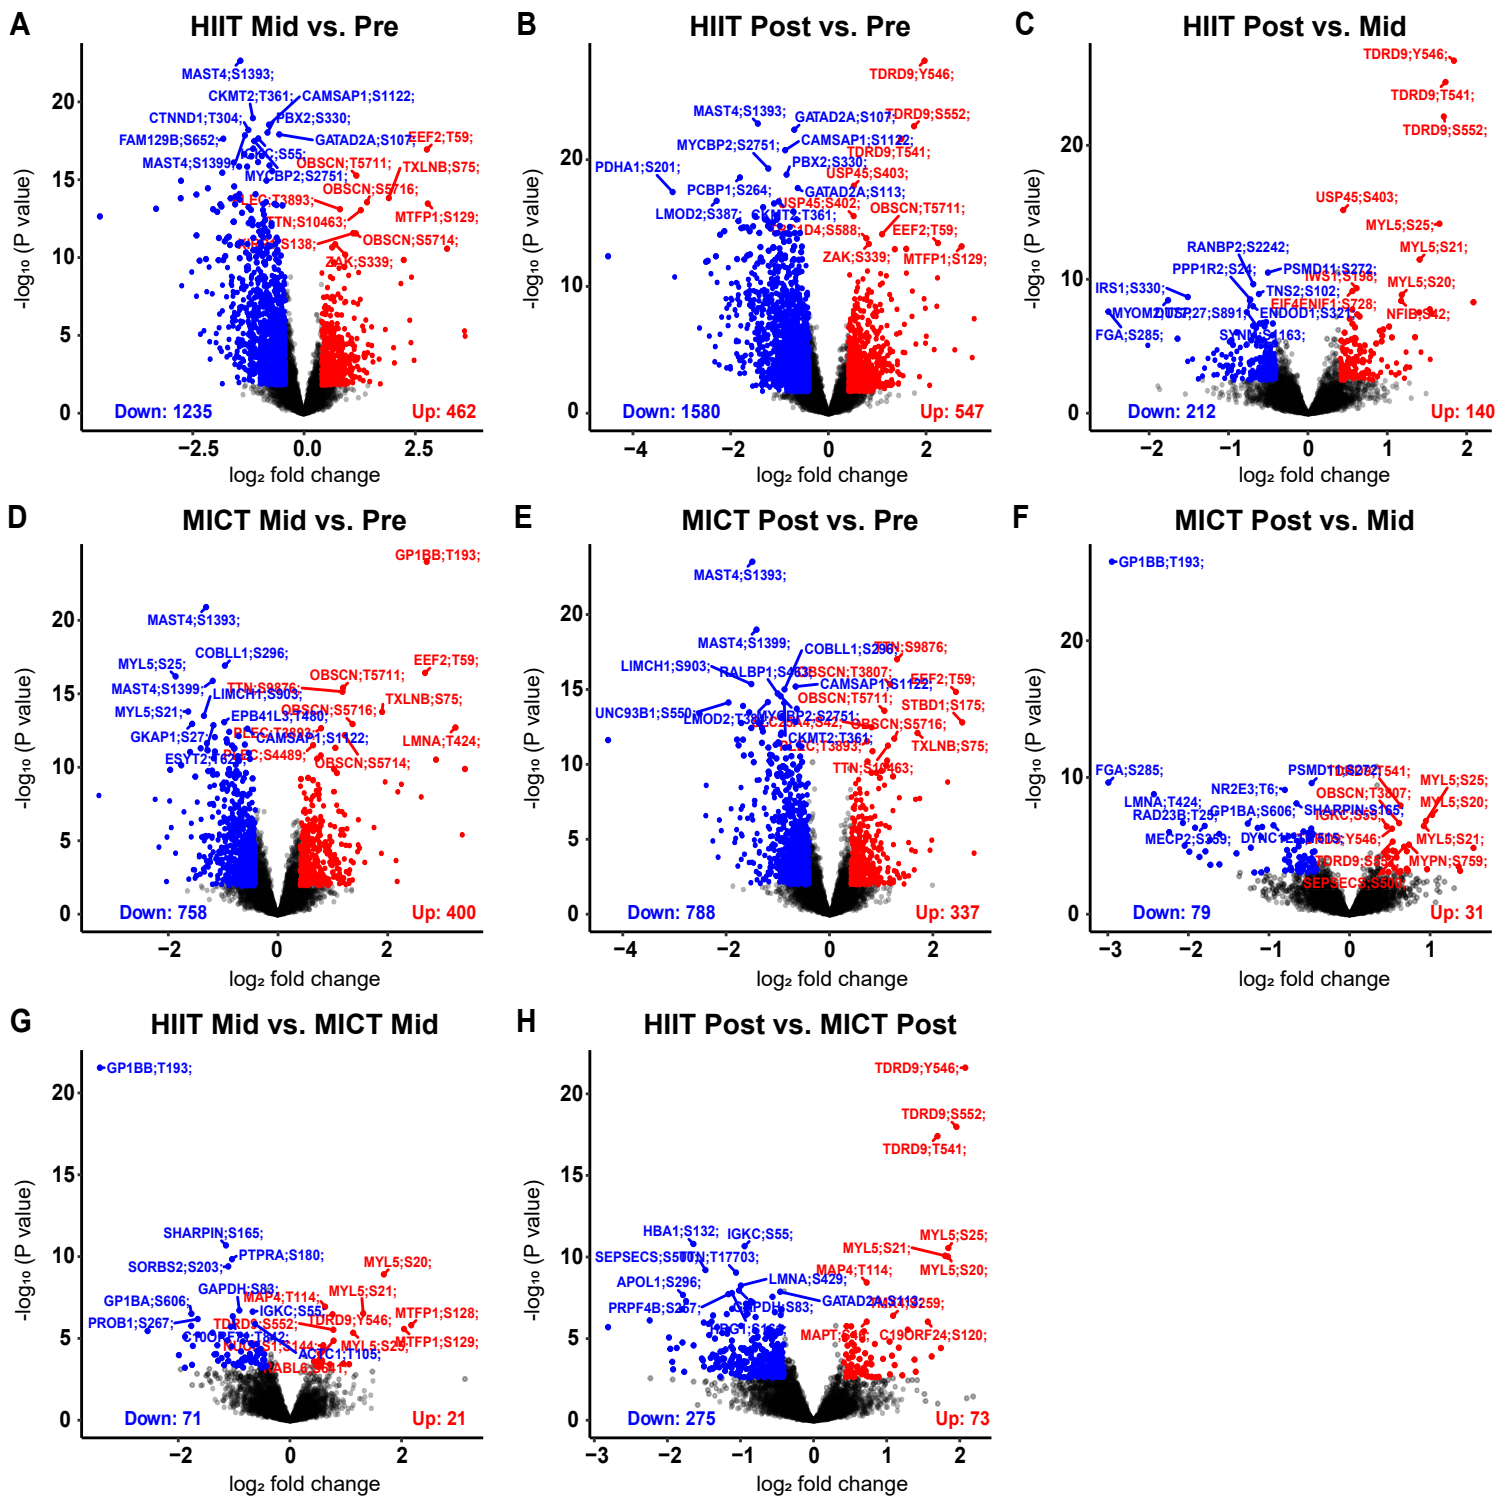

Figure 4

A

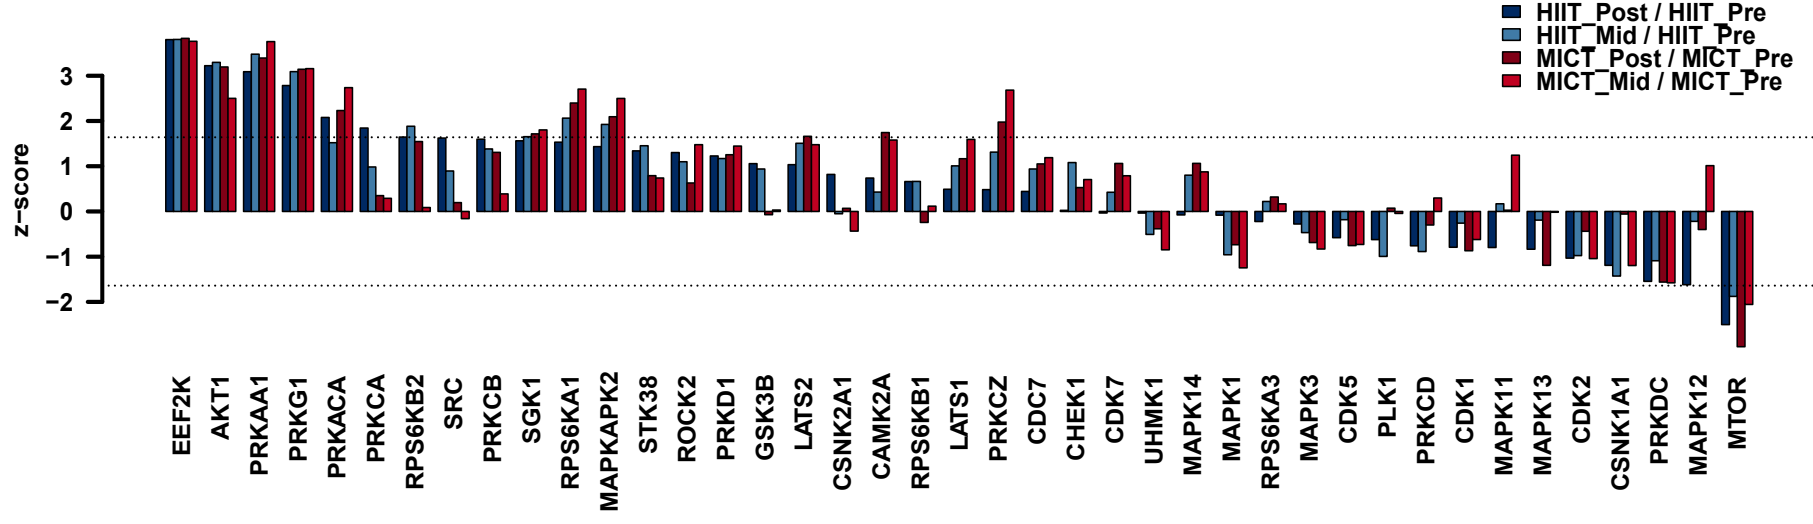

B

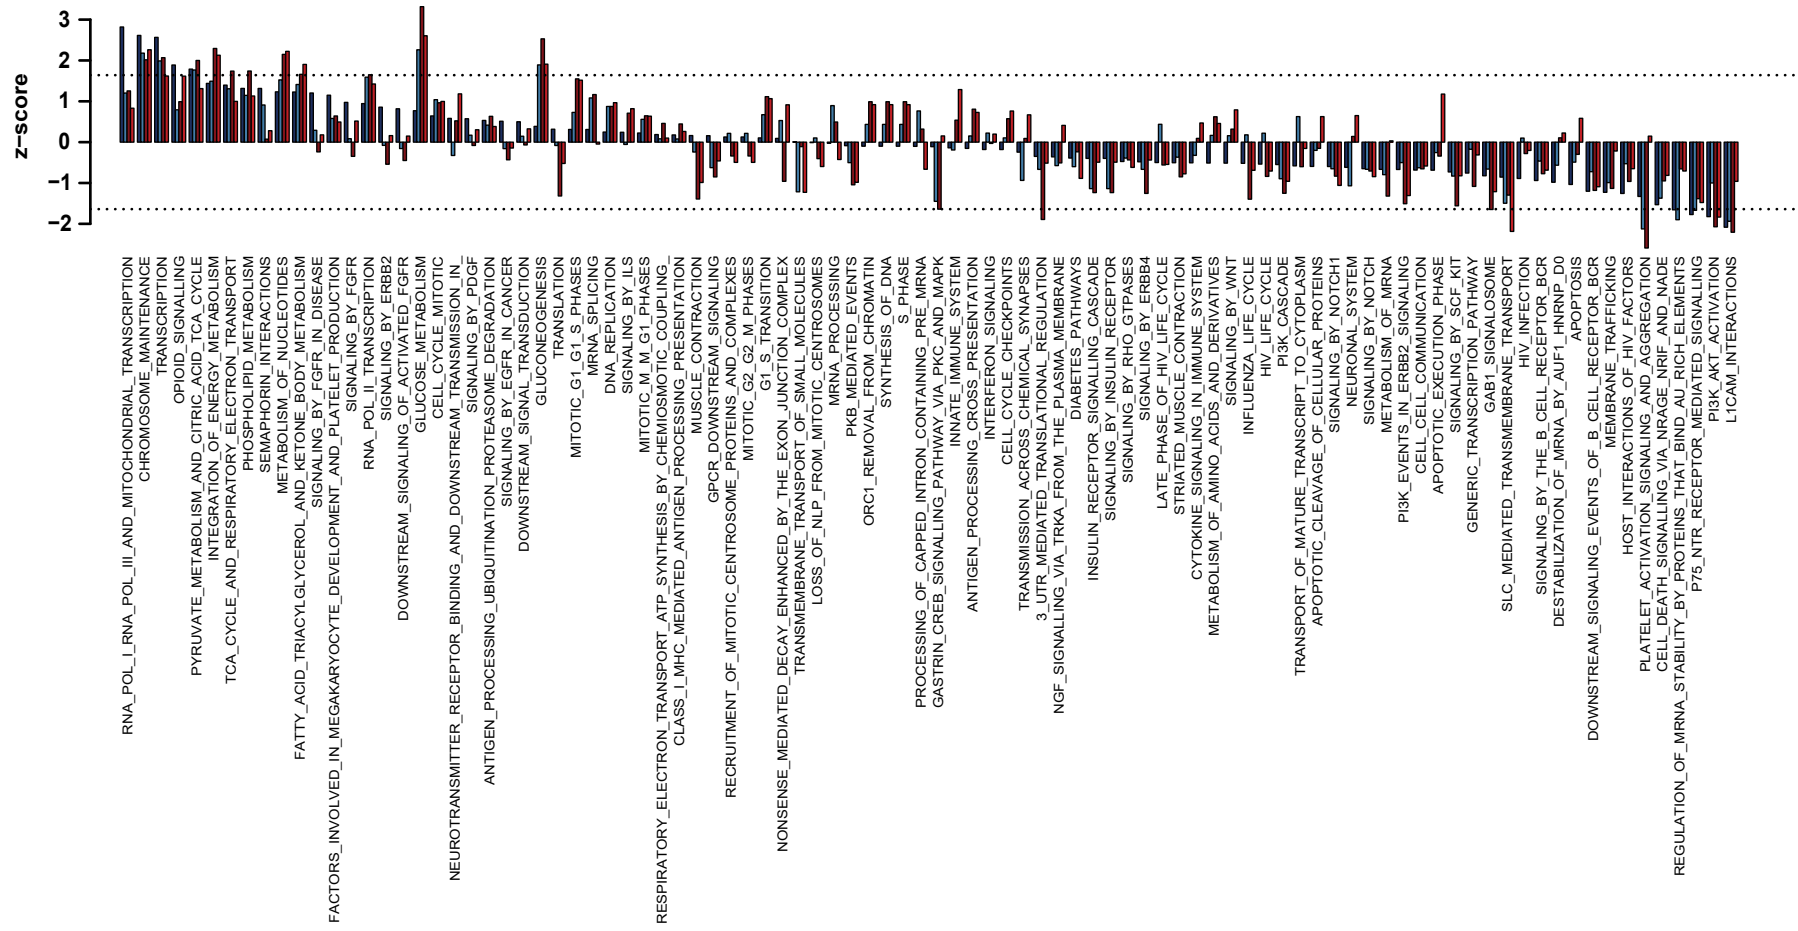



**Figure 5**

**A HIIT**

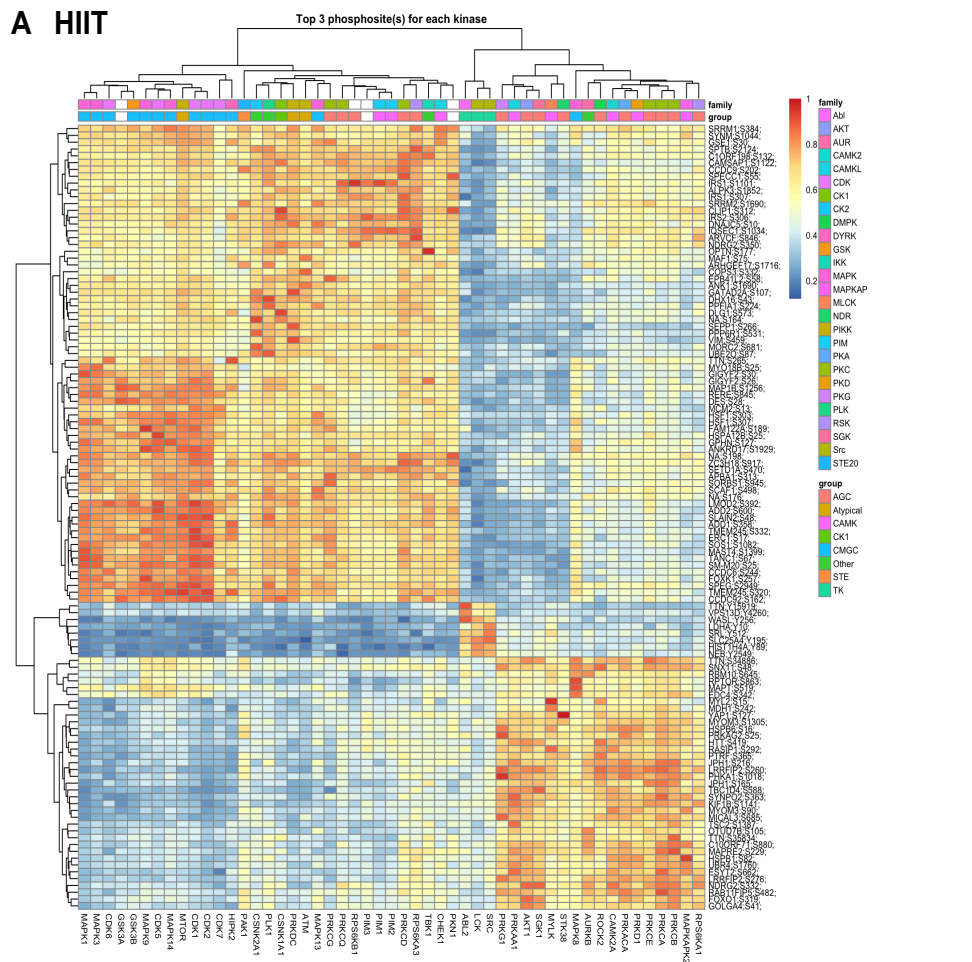

**B MICT**

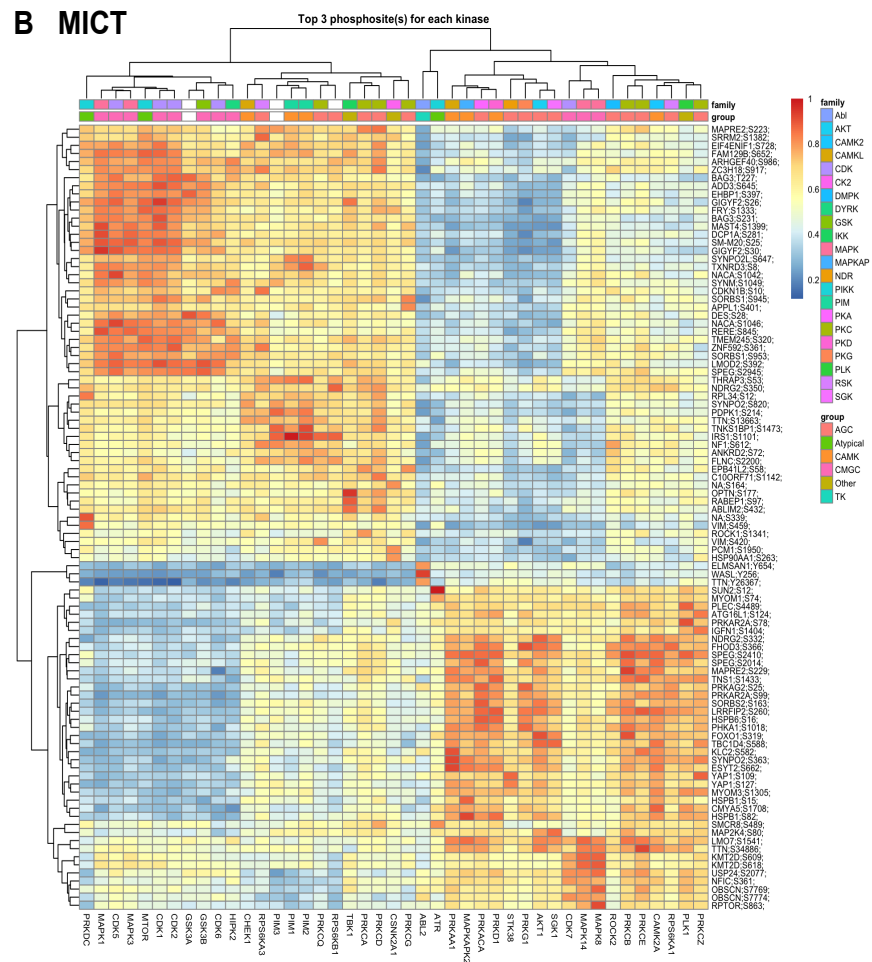

**C HIIT**

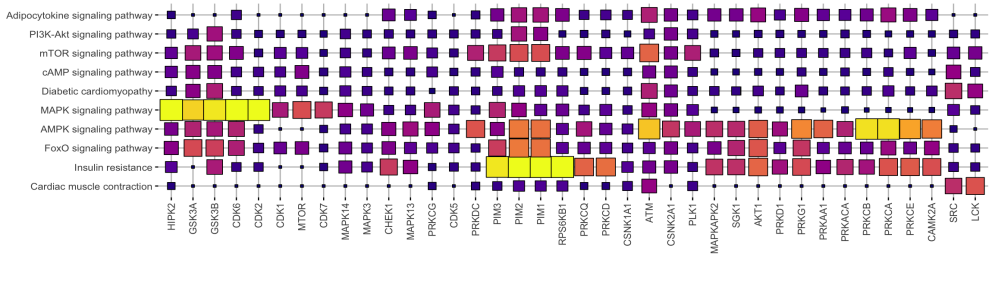

**D MICT**

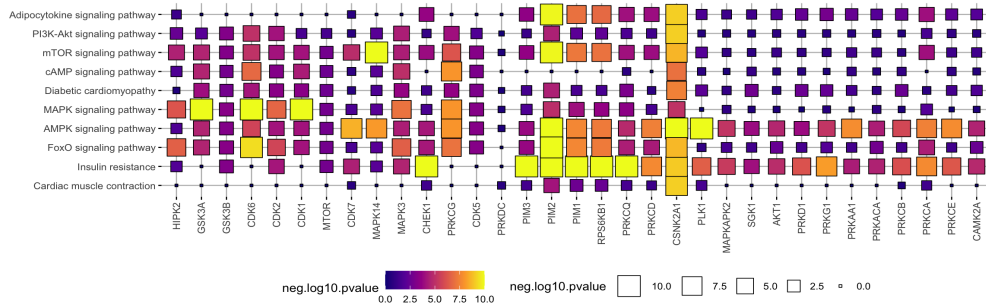

**Figure 6**

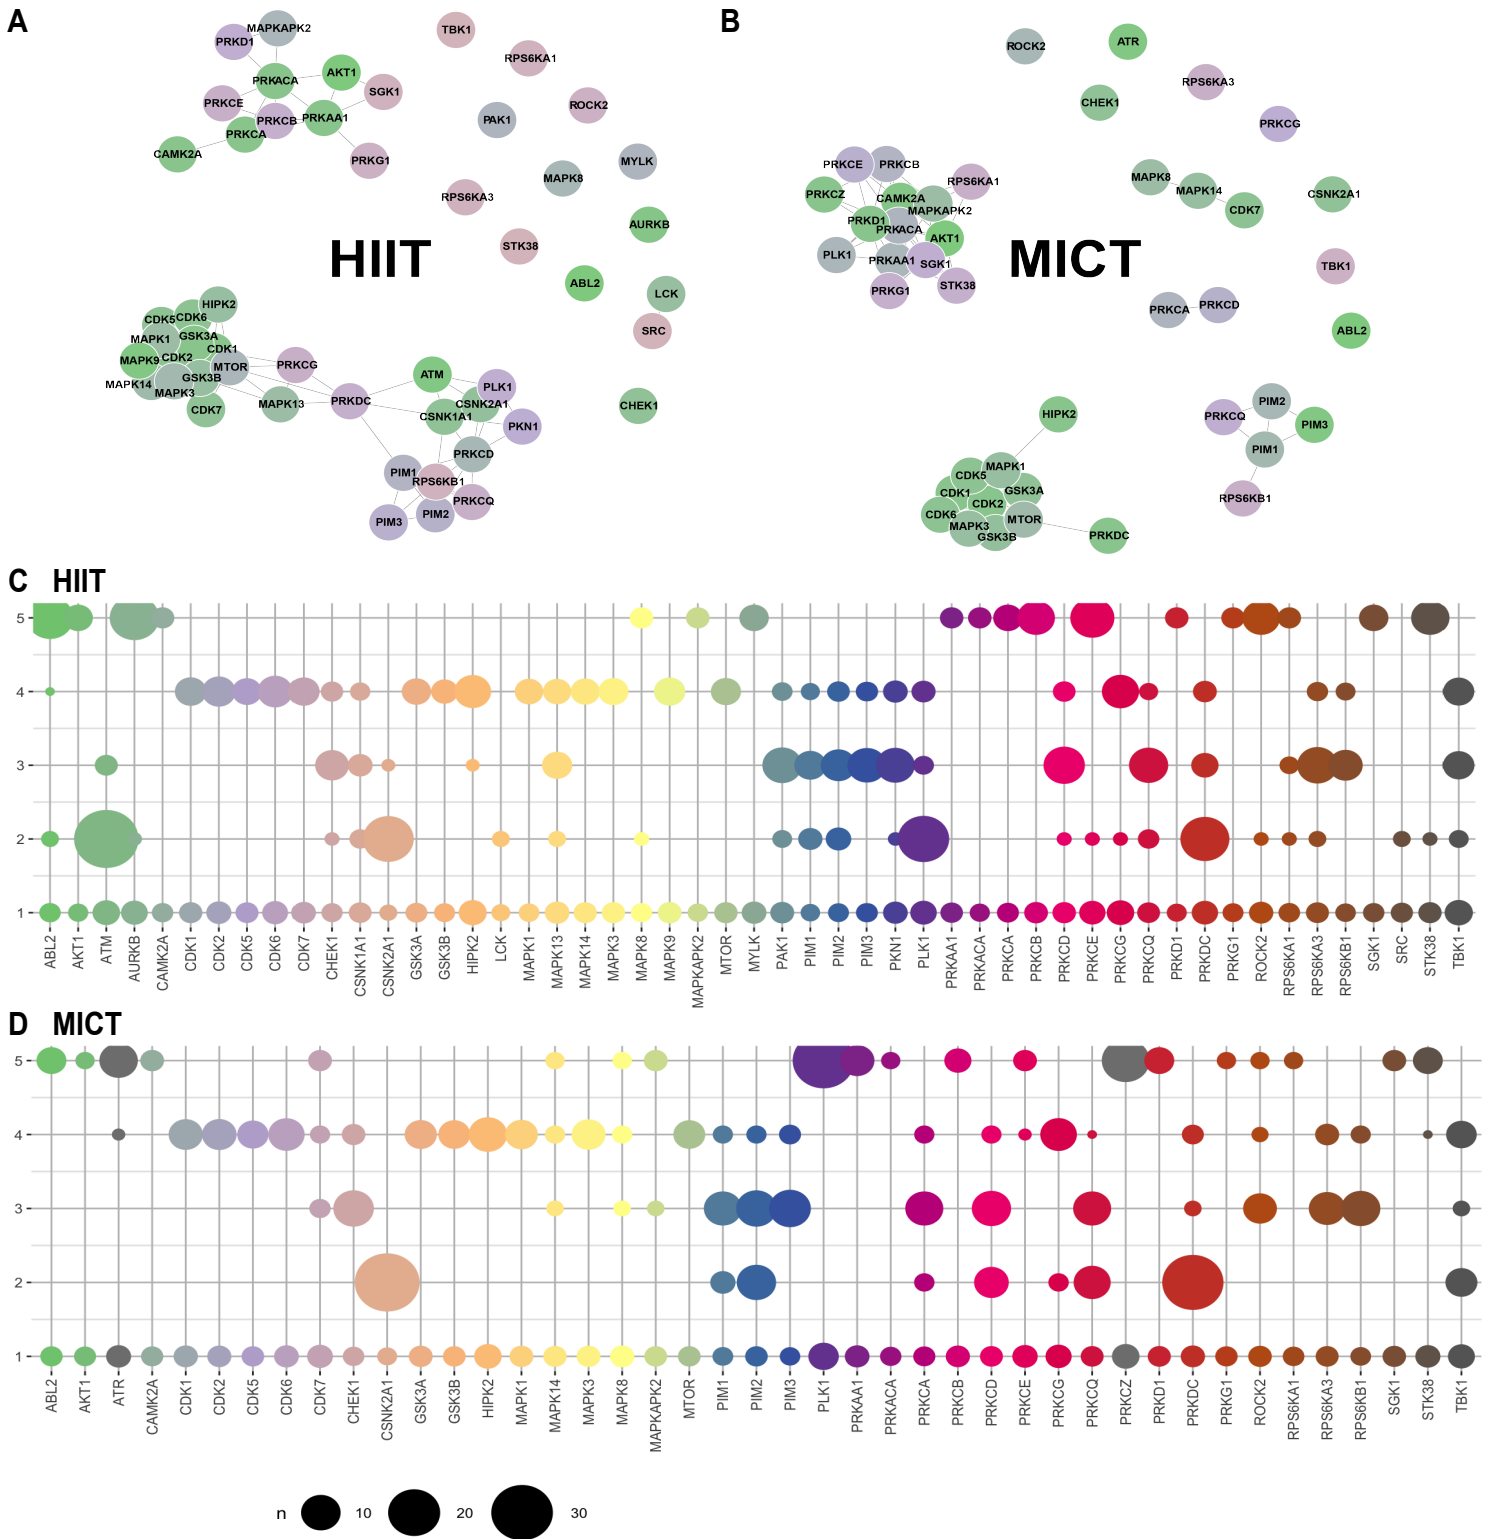

Figure 7

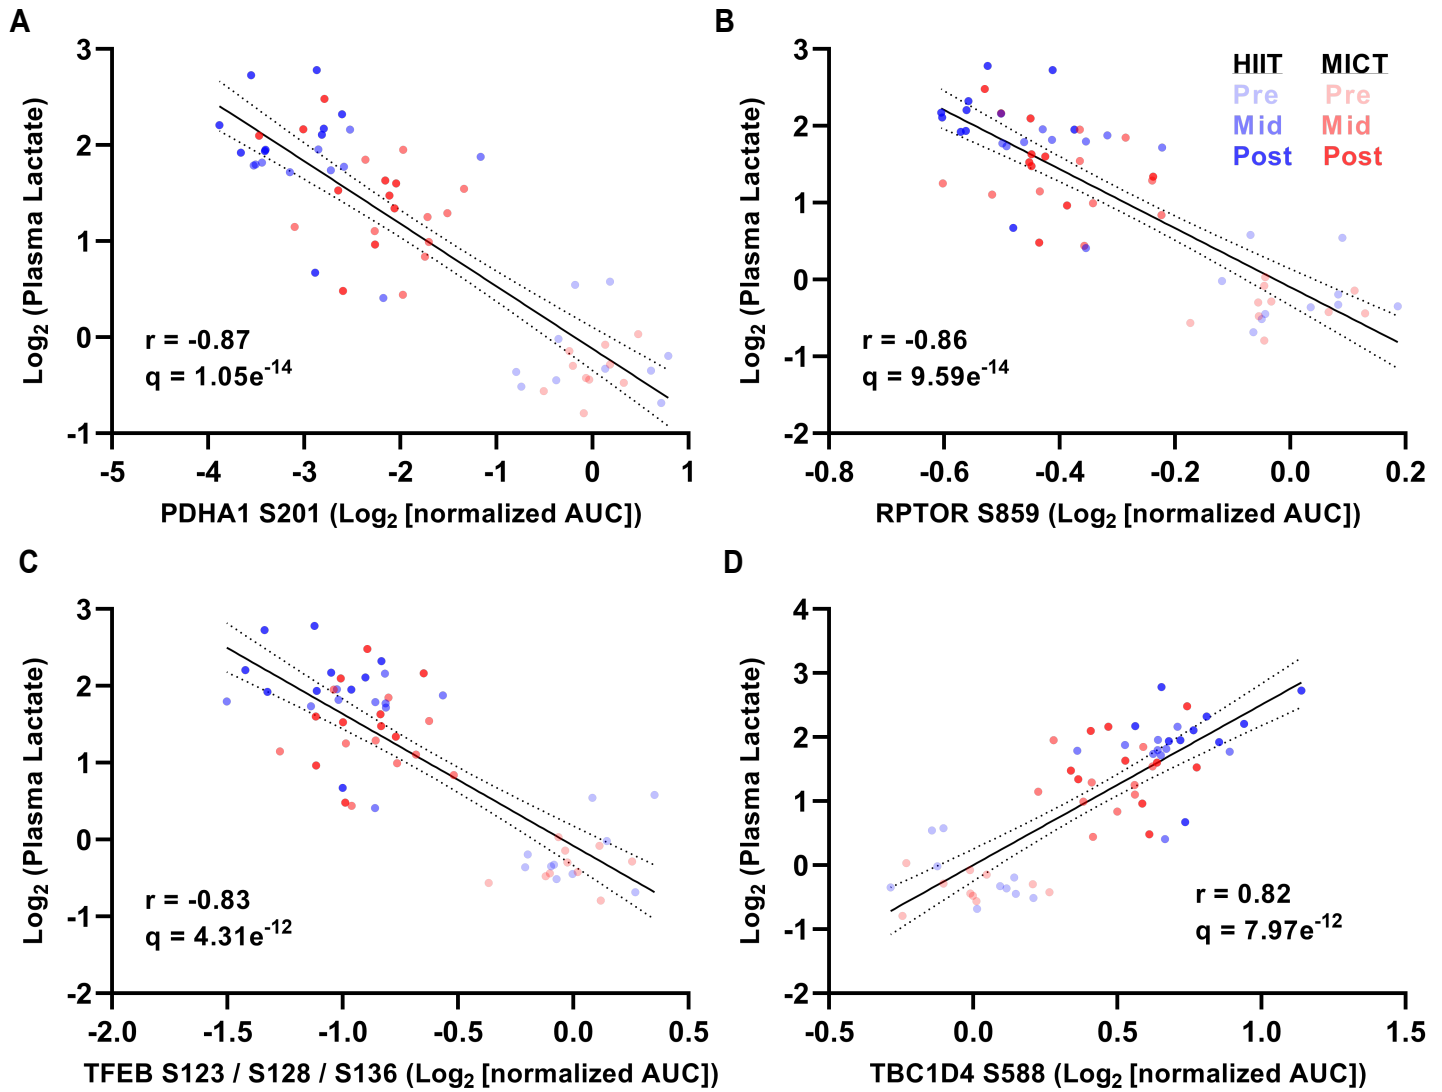

Source: https://medrxiv.org/content/10.1101/2024.07.11.24310302v1.full.pdf
